## Activation of polarized cell growth by inhibition of cell polarity

Marco Geymonat<sup>1,2</sup>, Anatole Chessel<sup>1,2,§</sup>, James Dodgson<sup>1,2</sup>, Hannah Punter<sup>1</sup>, Felix Horns<sup>2,†</sup>, Attila Csikász Nagy<sup>3,4,5</sup>, Rafael Edgardo Carazo Salas<sup>1,2\*</sup>

<sup>1</sup> Pharmacology & Genetics Departments, University of Cambridge, Downing Street, Cambridge, CB2 3EH, United Kingdom.

<sup>2</sup> The Gurdon Institute, University of Cambridge, Tennis Court Road, Cambridge, CB2 1QN, United Kingdom.

<sup>3</sup> Department of Computational Biology, Research and Innovation Centre, Fondazione Edmund Mach, San Michele all'Adige, 38010, Italy.

<sup>4</sup> Pázmány Péter Catholic University, Faculty of Information Technology and Bionics, 1083 Budapest, Hungary.

<sup>5</sup> The Randall Division of Cell and Molecular Biophysics and Institute of Mathematical and Molecular Biomedicine, King's College London, SE1 1UL, United Kingdom.

\* Correspondence to: [rc16805@bristol.ac.uk](mailto:rc16805@bristol.ac.uk)

Current address: ¶School of Cellular and Molecular Medicine, University of Bristol, Bristol, BS81TD, UK. †Biophysics Graduate Program, Stanford University, Stanford, CA 94305, USA. §LOB, Ecole Polytechnique, CNRS, INSERM, Université Paris-Saclay, 91128 Palaiseau Cedex, France.

**Running title:** Activation of polarized growth by inhibition of polarity

1 **Abstract**

2 **A key feature of cells is the capacity to activate new functional polarized domains**  
3 **contemporaneously to pre-existing ones. How cells accomplish this is not clear.**  
4 **Here, we show that in fission yeast inhibition of cell polarity at pre-existing**  
5 **domains of polarized cell growth is required to activate new growth. This**  
6 **inhibition is mediated by the ERM-related polarity factor Tea3, which**  
7 **antagonizes the activation of the Rho-GTPase Cdc42 by its co-factor Scd2. We**  
8 **demonstrate that Tea3 acts in a phosphorylation-dependent manner controlled**  
9 **by the PAK kinase Shk1 and that, like Scd2, Tea3 is direct substrate of Shk1.**  
10 **Importantly, we show that Tea3 and Scd2 compete for their binding to Shk1,**  
11 **indicating that their biochemical competition for Shk1 underpins their**  
12 **antagonistic roles in controlling polarity. Thus, by preventing pre-existing**  
13 **growth domains from becoming overpowering, Tea3 allows cells to redistribute**  
14 **their polarity-activating machinery to prospective sites and control their timing**  
15 **of activation.**  
16

17 **Main text**

18 **Introduction**

19 Countless aspects of cellular function rely on the capacity of cells to activate multiple  
20 functionalized domains at their cortex simultaneously. This phenomenon underlies  
21 cellular behaviors such as migration, differentiation or chemotaxis, but how cells  
22 assemble new functional cell polarity areas in the presence of pre-existing ones is not  
23 fully understood. The cylindrically-shaped fission yeast (*Schizosaccharomyces*  
24 *pombe*) recapitulates this conundrum. Newly born *S. pombe* cells grow in a  
25 monopolar fashion only from their pre-existing ‘old end’ (OE), which was inherited  
26 from their mother at cell division. This old end becomes growth competent after an  
27 event called ‘old end take off’ (OETO). The ‘new end’ (NE) formed at the site of  
28 division during septation, albeit polarized, is functionally incapable of growing until  
29 later in the cell cycle when “new end take off” (NETO (Mitchison and Nurse, 1985))  
30 happens and cells switch on bipolar growth for the remainder of the cycle. The NETO  
31 bipolar growth switch involves a number of proteins (Huisman and Brunner, 2011),  
32 including: the Kelch-repeat factors Tea1 and Tea3, the Tea1-interactor Tea4 and the  
33 actin-interacting protein Bud6, which are polarity landmarks delivered to cell ends in  
34 a microtubule-dependent manner; the actin-nucleating Tea4-interacting formin For3,  
35 which in conjunction with the active Rho-like GTPase Cdc42 assembles an array of  
36 actin cables at the cell ends that directs there exocytosis; and the DYRK kinase Pom1,  
37 which contributes to confine active Cdc42 to cell ends by restricting the localization  
38 of the Cdc42 GTPase Activating Protein (GAP) Rga4 to the cell sides.

39

## 40 **Results and Discussion**

41 Although the mechanistic contribution of most *S. pombe* polarity factors is well-  
42 studied, much less is known about Tea3 - a protein distantly related to the ERM  
43 (Ezrin/Radixin/Moesin) protein family (Arellano et al., 2002). *tea3Δ* (*tea3*-deleted)  
44 cells are NETO defective, which has led to the suggestion that Tea3 is an activator of  
45 polarized growth (Arellano et al., 2002; Niccoli et al., 2003), and looking at Tea3-  
46 GFP revealed that as published (Arellano et al., 2002) the protein localizes both at the  
47 cell ends as well as at the septum, i.e. areas of the cell where growth occurs. However,  
48 on close inspection we found that Tea3's localization pattern anti-correlates  
49 conspicuously with that of polarized cell growth, much more than originally noted  
50 (Arellano et al., 2002). This was particularly obvious when we co-expressed Tea3-  
51 GFP with the RFP-labelled  $\beta$ -glucan synthase Bgs4 (a marker of growing cell  
52 domains (Cortes et al., 2005)) and found that, though always present to some extent at  
53 cell ends, Tea3 anti-correlates with Bgs4 accumulation at the cortex throughout the  
54 entire cell cycle (Figure 1A left). Specifically, we found that Tea3 cortical  
55 enrichment: a) increases at the NE and decreases at the OE following OETO; b) drops  
56 at the NE following NETO; and c) rises again at both cell ends at septation (Figure 1A  
57 middle and right). In stark contrast with its earlier suggested role as an activator of  
58 polarity (Arellano et al., 2002), these observations suggested that Tea3 becomes  
59 enriched at inactive polarity areas and, therefore, that it could be an inhibitor of  
60 polarity.

61

62 To test this, we looked at the impact of *tea3* deletion (knock-out) on the accumulation  
63 of the Cdc42-activating machinery at the cell cortex. The Rho-like GTPase Cdc42 and  
64 its GTP-loading co-factors Scd1 (a Cdc42 Guanosine Exchange Factor (GEF)) and

65 Scd2 (a scaffold protein, co-activator of Scd1) are major regulators of polarized  
66 growth in this species (Rincon et al., 2014), and the cortical abundances of GTP-  
67 Cdc42, Scd1 and Scd2 quantitatively report on the level of polarity activity at cell  
68 ends (Abenza et al., 2015; Bendezu et al., 2015; Das et al., 2012). Strikingly, when we  
69 measured the levels of Scd1 and Scd2 at the cell cortex in *tea3Δ* monopolar cells, we  
70 found that both Cdc42 co-factors become significantly enriched at OEs in *tea3Δ* cells  
71 (Figures 1B-1C and Figure 1-figure supplement 1E-F). This enrichment was specific  
72 to *tea3Δ*, as Scd1/Scd2 did not become enriched at the OEs in monopolar wild-type  
73 cells or in the cells of another monopolar mutant *rgf1Δ* (Figure 1B, right quantitation;  
74 Rgf1 is a Rho1-GEF (Garcia et al., 2006)), and it was specific to Scd1/Scd2, as Bgs4  
75 (itself another positive regulator of polarized growth) did not become enriched at OEs  
76 in monopolar *tea3Δ* cells (Figure 1D). These data demonstrate that in the absence of  
77 Tea3 cell polarity activation at the cortex increases in cells, and indicates therefore  
78 that in wild-type cells Tea3's role is in fact to suppress the enrichment of Cdc42  
79 activators at the cortex and to inhibit Cdc42 activity and cell polarity.

80

81 How could Tea3, an inhibitor of polarity, activate polarized growth at NETO?

82

83 One possibility would be if, by being enriched at non-growing ends (NEs) before  
84 NETO, Tea3 could maintain polarity inhibited there until a signal(s) would lead to its  
85 delocalization and, consequently, to the activation of polarized growth at the NE. A  
86 prediction of this would be that NETO could only happen once Tea3 becomes  
87 displaced from the NE. Therefore we looked in time-lapse sequences whether Tea3  
88 displacement precedes, is coincident with or follows NETO (as assessed by *de novo*  
89 RFP-Bgs4 recruitment to the NE; time-lapse interval: 10 min). We found that Tea3

90 depletion from the NE never precedes NETO (0/11 cells followed by time-lapse) and  
91 instead either coincides with NETO (7/11 cells) or follows it (4/11 cells). This  
92 suggests that, although we cannot exclude the possibility that Tea3 detachment from  
93 the NE could be involved in NETO, if indeed Tea3 inhibits polarity at the NE that  
94 inhibition is relieved by NETO rather than causative for NETO. We conclude that the  
95 NETO switch likely does not depend on Tea3's function at the NE.

96

97 Could NETO depend on Tea3's function at the OE (i.e. the pre-existing, actively  
98 growing end)? To test this possibility, we sought to deplete Tea3 from the OE. We did  
99 this by forcing Tea3 to dimerize with the Cdc42 GTPase Activating Protein Rga4  
100 (normally excluded from actively growing OEs) or with the Wee1 regulating kinase  
101 Cdr2 (confined to the cell middle), using the GFP-GBP (GFP Binding Protein) system  
102 (Rothbauer et al., 2008). Co-expression of Rga4-GFP with Tea3-GBP led Tea3 to  
103 become depleted from the growing end and both proteins to become enriched at the  
104 non-growing end in interphase cells (Figure 1E and Figure 1-figure supplement 1A).  
105 This led to a large increase in the percentage of monopolar, NETO-defective cells  
106 (Figure 1F and Figure 1-figure supplement 1B). We then co-expressed Cdr2-GFP  
107 with Tea3-GBP and found that Tea3 became depleted from both the growing and non-  
108 growing ends (Figure 1E and Figure 1-figure supplement 1A), and that this led  
109 equally to a large increase in monopolar NETO-defective cells (Figure 1F).  
110 Importantly, in both cases additional co-expression of untagged Tea3 partially rescued  
111 bipolarity (Figure 1F and Figure 1-figure supplement 1D) without affecting the level  
112 of Rga4-GFP or Cdr2-GFP, and hence of Tea3-GBP, at the non-growing end (Figure  
113 1-figure supplement 1C). (Note: the partial rescue is likely due to the fact that Tea3  
114 makes clusters in cells (Dodgson et al., 2013), and has the capacity to self-interact

115 ((Snaith et al., 2005) and Figure 5-figure supplement 1A); therefore it is highly likely  
116 that part of the untagged Tea3 interacts with Tea3-GBP and is delocalized from the  
117 growth end, and hence cannot fully rescue the NETO defect observed upon co-  
118 expression with Rga4-GFP/Cdr2-GFP.) Taken together, these results imply that Tea3  
119 depletion from the growing end impairs NETO, and therefore that the NETO-  
120 controlling function of Tea3 is most likely to inhibit Cdc42-mediated cell polarity at  
121 the growing OE.

122

123 How then could Tea3 control Cdc42 activity? It has been shown that the function of  
124 many ERMs and related proteins is controlled by phosphorylation (Fievet et al., 2004;  
125 Hirao et al., 1996; Kissil et al., 2002; Nakamura et al., 1995; Pietromonaco et al.,  
126 1998; Yonemura et al., 2002) and Tea3 itself is predicted to be a phospho-protein  
127 (Beltrao et al., 2009; Carpy et al., 2014; Wilson-Grady et al., 2008). Hence, we  
128 reasoned that investigating Tea3's phospho-regulation *in vivo* could help clarify its  
129 function. Immuno-precipitation of Tea3-GFP from wild-type cells revealed one band  
130 by Western blot that migrated faster after treatment with lambda phosphatase (Figure  
131 2A lanes 1 and 2), demonstrating that Tea3 is phosphorylated *in vivo*, as predicted.  
132 Tea3 phosphorylation was observed in lysates from *cdc10-129* (G1 arrested) and  
133 *cdc25-22* (G2 arrested) cells, indicating that it is not cell cycle dependent in any  
134 obvious manner (Figure 2A lanes 3 to 6 and Figure 2-figure supplement 1).  
135 Interestingly, it was disrupted in cells lacking Mod5, a prenylated protein which  
136 concentrates at cell ends and anchors Tea3 cortically at the membrane (Snaith et al.,  
137 2005; Snaith and Sawin, 2003) (Figure 2B left panel). Furthermore, we found the  
138 phosphorylation to be specifically dependent on the polarity-linked PAK kinases Shk1  
139 and Nak1 (Figure 2C), which also localize at cell ends (Matsuyama et al., 2006).

140 These observations imply that Tea3's phosphorylation is dependent on its cortical  
141 anchoring and might take place cortically within cells. Six phosphorylation sites have  
142 been found at the Tea3 C-terminus (Beltrao et al., 2009; Carpy et al., 2014; Wilson-  
143 Grady et al., 2008) and one of them (position 1045) is a putative PAK consensus site,  
144 KRLS (Knaus et al., 1991), similar to the one found in the ERM-related factor Merlin  
145 (position 518) and phosphorylated *in vivo* by PAK2 (Kissil et al., 2002). In order to  
146 investigate the role of phosphorylation, we generated a phospho-impaired Tea3  
147 mutated in all six sites (Tea3-6A-GFP; Figure 2B right panel). Interestingly, while  
148 Tea3-6A-GFP localized normally through the cell cycle (Figure 2D and Figure 2-  
149 figure supplement 2) we found that it induces a stark defect in NETO identical to that  
150 observed in *tea3Δ* cells (Figure 2E-2F). Therefore, Tea3's PAK-dependent  
151 phosphorylation is crucial to its NETO-regulating function.

152

153 As the PAK kinase Shk1 has been shown to interact directly with Scd2, and by  
154 complexing with Scd2 it has been hypothesized to positively control Cdc42 activity  
155 (Bendezu and Martin, 2012; Chang et al., 1999), we surmised that Shk1 might be the  
156 relevant kinase at play and that it might interact directly with Tea3 as well. To test  
157 that, we expressed and purified Tea3 and Shk1, and tested whether the pure proteins  
158 interact. To our good surprise, we found not only that the proteins interact *in vitro*  
159 (Figure 3A) but also that Shk1 phosphorylates Tea3 directly (Figure 3B). Given that  
160 Tea3 suppresses the cortical enrichment of Scd2 at OEs (Figure 1B), and that both  
161 Tea3 and Scd2 are substrates of the kinase Shk1, we wondered if Tea3 might control  
162 Scd2 enrichment at the cortex by competitively interacting with Shk1. To ask this, we  
163 first expressed and purified Scd2 and we verified that it interacts with Shk1 directly in  
164 our experimental conditions (Figure 3C), as reported (Chang et al., 1999). We then



165 tested *in vitro* the binding affinity of Tea3 to Shk1 in absence or presence of excess  
166 Scd2, and found that the binding affinity of Tea3 to Shk1 decreases to 30% in the  
167 presence of Scd2, demonstrating that Scd2 can outcompete Tea3 (Figure 3D).  
168 Reciprocally, we found that the binding affinity of Scd2 to Shk1 decreases to 75% in  
169 the presence of excess Tea3, demonstrating that Tea3 can also outcompete Scd2 *in*  
170 *vitro* (Figure 3E). Interestingly, we found that Tea3 outcompetition of Scd2 only  
171 occurs in presence of ATP (Figure 3E) and does not happen between excess Tea3-6A  
172 and Scd2 (Figure 3F), suggesting a possible differential role for phosphorylation in  
173 controlling Tea3-Shk1 versus Scd2-Shk1 interaction.

174

175 Taken together, these results demonstrate that Tea3 and Scd2 competitively interact  
176 with Shk1 *in vitro*, suggesting they might also recapitulate features of that behaviour  
177 *in vivo*. This was confirmed as follows.

178

179 A first prediction is that in *tea3-6A* cells, which phenocopy *tea3Δ*'s NETO delay  
180 (Figure 2E-2F), Scd2 should also become enriched at the OE cell cortex in monopolar  
181 cells, given that *in vitro* Tea3-6A cannot outcompete Scd2-Shk1 interaction (Figure  
182 3F). We found that indeed Scd2 becomes significantly enriched at OEs in those cells  
183 like in *tea3Δ* cells and as observed in *orb2-34* cells (Das et al., 2012) (*orb2-34* is a  
184 *shk1* mutant allele) (Figure 3G). A second prediction is that, just like Tea3 suppresses  
185 Scd2 enrichment at the OE cell cortex (Figure 1B), Scd2 should reciprocally also  
186 suppress Tea3 enrichment at the OE cortex. As predicted, we found that indeed in  
187 *scd2Δ* cells Tea3 becomes cortically enriched (Figure 3H). A third prediction is that it  
188 should be possible to observe a differential binding affinity of Tea3 or Scd2 for Shk1  
189 *in vivo*, in presence versus absence of the competitor. In agreement with this

190 prediction, we found that whilst an interaction of Shk1 with Tea3 was undetectable *in*  
191 *vivo* in wild-type cells, in *scd2Δ* cells that interaction was readily detected (Figure  
192 3I). These data demonstrate that *in vivo* Tea3 and Scd2 competitively bind their  
193 common kinase Shk1.

194

195 Tea3's Shk1-dependent antagonism with Scd2 and its Cdc42 negative regulatory  
196 function are reminiscent of negative feedbacks shown to be required for fuelling  
197 oscillatory behaviour of Cdc42 activity at the cell cortex, in both budding and fission  
198 yeast cells. In *S. cerevisiae*, it was recently demonstrated that a negative feedback  
199 provided by the PAK kinase Cla4 inhibits the catalytic activity of the Cdc42 GEF  
200 Cdc24 (Kuo et al., 2014). In *S. pombe* the existence of a negative feedback required  
201 for NETO was postulated based on mathematical modelling and, interestingly, it was  
202 also suggested to involve the similar PAK kinase Shk1 (Das et al., 2012).

203

204 We wondered if Tea3 is part of that feedback mechanism and asked whether, like  
205 GTP-Cdc42, its level fluctuates/oscillates at cell ends. Hence, we co-expressed CRIB-  
206 mCh (an indirect reporter of GTP-Cdc42) and Tea3-GFP in cells, imaged them by  
207 time-lapse microscopy and we quantitated the fluctuation of their fluorescence  
208 intensity at cell ends by automated image analysis. As previously reported, we  
209 observed that about half of wild-type cells display CRIB oscillations between both  
210 cell ends (period  $535.5 \pm 207$  seconds,  $n=202$  tracked cells; Figs. 4A top and 4B).  
211 Conspicuously, we found that Tea3 also oscillates between the cell ends (period  
212  $792 \pm 297$  seconds,  $n=202$  tracked cells; Figs. 4A bottom and 4C) in approximately  
213 half of wild-type cells, suggesting that Tea3 could indeed be linked to the GTP-Cdc42  
214 oscillation gearbox. To test this directly, we quantitated CRIB oscillations in *tea3Δ*

215 cells and found that in those cells their period of oscillation is 30% longer than in  
216 wild-type cells (Figure 4D). Interestingly, Shk1 suppression has been shown to affect  
217 GTP-Cdc42 oscillations similarly to Tea3 (Das et al., 2012). This result demonstrates  
218 that Tea3 participates mechanistically in the control of GTP-Cdc42 oscillations in  
219 cells, and suggests a key Shk1-mediated role for Tea3 in the negative feedback loop  
220 that drives these oscillations. Lastly, we asked whether, despite their difference in  
221 period of oscillation, Tea3 and GTP-Cdc42 oscillations are linked. By measuring the  
222 cross-correlation between the two oscillations we found that Tea3 and GTP-Cdc42  
223 oscillate within a phase difference of  $\pm \pi/2$  and are therefore linked (Figure 4E).  
224 Taken together, our results demonstrate that (although likely not the only component  
225 (Das et al., 2015)) Tea3 is integral to the negative feedback mechanism that controls  
226 the GTP-Cdc42 oscillations important for the bipolar switch in fission yeast.

227

228 It is interesting to note that though Tea3 negatively regulates Cdc42, GTP-Cdc42 and  
229 Tea3 oscillate between the two cell ends with distinct periods. Whilst these two  
230 findings could seem superficially at odds with each other, it is important to point out  
231 that both proteins are imperfect, stochastic oscillators. This is evident from the  
232 original publication describing GTP-Cdc42's oscillatory behaviour in fission yeast  
233 (Das et al., 2012), where only half of cells were seen to manifest clear oscillations.  
234 Likewise, it can be seen from our results that both oscillators are imperfect and  
235 somewhat erratic (Figs. 4A-4C), and similarly we could only detect Tea3's oscillation  
236 in half of cells. Because of this stochastic nature, it follows that an exact relationship  
237 between their oscillatory behaviours is probably impossible in practice. Furthermore,  
238 we note that the whole system is likely not entirely described by Tea3 and GTP-  
239 Cdc42, but may include other stochastically-oscillating players (see for example (Das

240 et al., 2015)), which could cause counter-intuitive differences in the Tea3 and GTP-  
241 Cdc42 periods. Despite this, we can affirm that there is a link between both factor's  
242 oscillations, i.e. their phase difference is not random but constrained between  $\pm \pi/2$ ,  
243 which demonstrates that GTP-Cdc42 and Tea3 oscillations are part of the same  
244 machinery.

245

246 Finally, we wondered if Tea3's polarity inhibitor function and its functional  
247 antagonism with the polarity activator Scd2 might be sufficient to account for Tea3's  
248 role in both regulating GTP-Cdc42 oscillations and controlling NETO. To test this,  
249 we did a simplified one-dimensional mathematical model, where we sought to  
250 recapitulate the Tea3-Scd2 antagonism by simulating a generic Cdc42 'activator'-  
251 'inhibitor' pair of activities, freely diffusing but cortically localized and retained at  
252 cell ends via interaction with microtubule-transported landmark proteins (Figure 5A;  
253 see Materials and Methods) (Csikasz-Nagy et al., 2008). The model is based on an  
254 earlier one dimensional reaction-diffusion model of cell polarity regulation (Csikasz-  
255 Nagy et al., 2008), shown to match several aspects of fission yeast growth patterns  
256 and used as the basis for other fission yeast polarity modelling efforts (Das et al.,  
257 2012; Thadani et al., 2011). Though based on Scd2 and Tea3, the activator and  
258 inhibitor activities we simulated were intentionally kept generic both because of our  
259 limited information on the Tea3-Shk1-Scd2 system and to make the least number of  
260 assumptions about the morphogenetic properties at play. In the model, we assumed a  
261 substrate-limited polarized growth activator (Act) and a substrate-limited inhibitor  
262 (Inh), both of which collected cortically at cell ends in an autocatalytic fashion (ActC  
263 and InhC, correspondingly). This is not an unrealistic assumption given that we had  
264 previously found that polarity regulators in this species localize to cortical clusters

265 likely generated by protein oligomerization (Dodgson et al., 2013) and that at least in  
266 the case of Tea3 we found that it has the capacity to self-interact (Figure 5-figure  
267 supplement 1A). Also, we assumed that Inh was a faster diffusing form of the  
268 inhibitor that interferes with the autocatalytic activation of Act, and conversely that  
269 ActC was a slower diffusing form of the activator that interferes with the autocatalytic  
270 stabilization of Inh, closing onto a negative feedback loop (Figure 5A, dotted blunt  
271 arrows) with a cross inhibition between fast- and slow-diffusing species. The  
272 existence of slow (ActC, InhC) and fast (Act, Inh) diffusing forms of the activator and  
273 inhibitor were based on our experimental observation that Scd2 and Tea3 diffuse  
274 faster in the cytoplasm than at the cell end cortex (Figure 5-figure supplement 1B).  
275 This difference in diffusion rates is a prerequisite for Turing-type pattern forming  
276 reactions (Goryachev and Pokhilko, 2008; Turing, 1952).

277

278 We then asked whether this simple activator-inhibitor *in silico* system is sufficient to  
279 recapitulate the major features of polarity activation observed *in vivo*.

280

281 In a ‘wild-type’ situation, when both the activator and inhibitor were present and  
282 allowed to antagonize each other *in silico*, initially small monopolar cells – with the  
283 activator concentrated at the OE and consequently the inhibitor concentrated at the  
284 NE – grew and became bipolar – with both the activator and inhibitor present in both  
285 ends - and this happened at a characteristic ‘NETO’ length (Figs. 5B and 5C), much  
286 like what is observed in cells. We first tested what happens when the antagonism  
287 between the activator and inhibitor are disrupted *in silico*. When the inhibitor was not  
288 able to antagonize the activator, we found that the level of activator at the growing OE  
289 of monopolar cells increased (Figure 5D), akin to the enrichment of Scd2/Scd1

290 observed at the OE in monopolar *tea3Δ* cells (Figure 1B). Notably, this enhanced  
291 enrichment of activator at the OE coincided with the cells undergoing NETO at a  
292 much longer length (i.e. having a NETO delay; Figure 5D) like *tea3Δ* cells *in vivo*  
293 (Figure 5E), demonstrating that polarity inhibition is required to properly activate new  
294 growth areas. Reciprocally, when the activator was not able to antagonize the  
295 inhibitor, we found that the inhibitor level at the OE of monopolar cells increased  
296 (Figure 5F), similar to Tea3 at the OE in monopolar *scd2Δ* cells (Figure 3H), and cells  
297 became NETO defective like *scd2Δ* cells. (Note: In the model this occurred because  
298 in absence of ActC's effect the inhibitor accumulated at the OE in the clustered form,  
299 which is incapable of inhibiting polarized growth there, leading to a NETO defect. *In*  
300 *vivo* this effect could add to the delay caused by the reduced Cdc42 activation in the  
301 absence of Scd2 (Kelly and Nurse, 2011), which was not explicitly modelled here.)

302

303 We then went on to test various perturbations on the NETO regulating system. We  
304 first tested the effect in our *in silico* experiments of perturbations in the cluster  
305 forming capabilities of Inh and Act. We found that those showed surprisingly  
306 different results in the simulation: when the background polymerization rate of the  
307 inhibitor was enhanced, we observed that this led to a predicted NETO delay (Figure  
308 5G), whilst instead NETO was predicted to be advanced when polymerization of the  
309 activator was enhanced (Figure 5H). Strikingly, when we mimicked this by enhancing  
310 clustering of Tea3 or Scd2 in cells, by inducing oligomerization of the GFP-labelled  
311 proteins using a previously published oligomer-inducing 3GBP construct (Dodgson et  
312 al., 2013), we found that this led correspondingly to NETO delay or advance *in vivo*,  
313 in agreement with the model's predictions (Figure 5I).

314

315 Since our model contains a negative feedback loop (Figure 5A), which could induce  
316 oscillations (Novak and Tyson, 2008) we then wondered if we could perturb the *in*  
317 *silico* system to display oscillations in the level of the activator between both cell ends  
318 ((Das et al., 2012) and Figure 4A). We found multiple ways to reach this (Figure 5J  
319 and Figure 5-figure supplement 2 and see Materials and Methods). Strikingly, when  
320 we decreased the effect of the inhibitor on the activator in the simulations (mimicking  
321 *tea3Δ* cells as above (Figure 5D) we observed longer period oscillations in the  
322 activator level at the cell ends, again just like *in vivo* (Figure 4D). We conclude that  
323 the antagonism between the polarity activator and the inhibitor suffices to account for  
324 all of the basic features of polarity activation observed *in vivo* and explains the  
325 mechanistic role of Tea3's inhibitor role in controlling the activation of new polarized  
326 growth at NETO.

327

328 In short, in monopolar cells competition of Tea3 and Scd2 for Shk1 binding leads to  
329 inhibition of the Cdc42-activating module, allowing the polarity-activating machinery  
330 to oscillate between cell ends and enabling a timely NETO switch (Figure 6). We  
331 propose therefore that Tea3 is part of the Shk1-dependent negative feedback loop  
332 previously found to control NETO (Das et al., 2012). By contrast, in absence of Tea3  
333 GTP-Cdc42 oscillations are impaired and NETO is delayed. Thus, polarity inhibition  
334 by Tea3 prevents growing cell ends from becoming overpowering (hyper-enriched)  
335 with active Cdc42 and allows its redistribution to prospective growth sites, as required  
336 for activating multiple areas of polarity at the cortex contemporaneously (Gierer and  
337 Meinhard.H, 1972; Rupes et al., 1999; Turing, 1952) as well as control of the timing  
338 of new growth activation. Interestingly, in this model Shk1 acts both at the level of  
339 the positive feedback (thought to be mediated by Scd2 (Chang et al., 1999)) and at the

340 level of the negative feedback (mediated by Tea3, shown here), underlying its central  
341 role in controlling polarity and the NETO switch.

342

343 The C-terminal region of Tea3 has a homology with the C-terminal F-actin binding  
344 domain present in the ERM-family proteins and Merlin (Arellano et al., 2002;  
345 Bretscher et al., 2002). This domain in Merlin and Moesin is subjected to  
346 phosphorylation by PAK-like kinases (Hipfner et al., 2004; Kissil et al., 2002) and is  
347 essential for their activity. Since Merlin and Moesin have been shown to negatively  
348 regulate Rac and Rho respectively (Shaw et al., 2001; Speck et al., 2003) and Tea3  
349 inhibits Cdc42, we propose that there is functional homology between the carboxyl  
350 terminal domain of Tea3 and the equivalent domains in the ERM-family proteins.  
351 Interestingly, both Merlin and Moesin are at the same time regulators of and regulated  
352 by small Rho-like GTPases, and it has been proposed that they are part of a feedback  
353 loop important for Rho/Rac regulation (Neisch et al., 2013; Shaw et al., 2001; Speck  
354 et al., 2003). We speculate that the role found here for Tea3 of activating polarized  
355 growth by inhibiting polarity could extend to other ERM-related proteins. They could  
356 equally control spatio-temporally cell polarity plasticity by modulating the tight  
357 balance of Rho GTPase activities and turnover at the cortex.

358



359 **Materials and Methods**

360 *S. pombe* strains and culture

361 The *S. pombe* strains used in this study are listed below. Media and general *S. pombe*  
362 methods are as described (Moreno et al., 1991).

363

364 *Plasmid construction*

365 A Sall-NotI fragment containing Tea3 ORF and 500 bp of promoter were amplified  
366 and cloned into the integrative plasmid pJK148-GFP. This construction, integrated at  
367 Leu1 locus, expressed a Tea3-GFP fusion protein that was able to complement the  
368 monopolarity of a *tea3Δ* strain. A plasmid expressing a phospho-mutant allele of Tea3  
369 (Tea3-6A) where 6 serine residues (950, 984, 1045, 1058, 1078 and 1080) were  
370 mutated in alanine was obtained by several rounds of mutagenic PCR. The mutagenic  
371 oligos used were: 5' **CGTAAGCTT**GCTGAGGTACAAATTGCATTG 3' (S950A  
372 shown in bold, underlined base indicates a silent mutation creating an HindIII site),  
373 5'**GCTTCCTCCGCTCCCTT**GAGATCATACTTT3' (S984A shown in bold,  
374 underlined base indicates a silent mutation eliminating an AflII site),  
375 5'**CATAAAAGACTTGCTGATGTTATCAACAGTCAGCAAAAATTTTGTCTTT**  
376 **GCCCC**ACAGGTATCTAAAGAT3' (S1045A and S1058A are shown in bold,  
377 underlined base indicates a silent mutation eliminating an Bsu36I site),  
378 5'**CCGCGGGCGCATT**TGCCGGC**GAAGAAATGCGTGCA** 3' (S1078A and  
379 S1080A are shown in bold, underlined base indicates a silent mutation creating an  
380 NaeI site). The PCR fragments were cloned into pJK148-Tea3-GFP using BglII-NotI  
381 sites. Each mutation was confirmed by plasmid sequencing.

382

383 In order to over-express Tea3, the nmt1 promoter (1.1 Kb) was amplified from pREP1  
384 and cloned into a modified version of pJK148 using ApaI-NcoI sites creating pJK148-  
385 nmt1. pJK148-nmt1-Tea3NT was obtained by cloning the first 1300 bp (containing a  
386 unique EcoRI site) of Tea3 ORF into NcoI-NotI sites of pJK148-nmt1. An ApaI-  
387 EcoRI fragment derived from pJK148-nmt1-Tea3NT was then cloned into pJK148-  
388 Tea3GFP cut with the same enzymes. Plasmid expressing Tea3-mCherry or Tea3-  
389 ProA-tag (i.e. protein A tag) were obtained by substituting GFP with amplified  
390 mCherry or ProA-tag using NotI-XmaI restriction enzymes.

391

#### 392 *Lysate preparation and immunoblotting*

393 To assess the phosphorylation status of Tea3 crude extract was obtained using the  
394 TCA method described in (Foiani et al., 1994). Briefly, pelleted cells (25 ml at OD<sub>562</sub>  
395 < 0.8) were washed with 20% TCA, resuspended in 400µl of 20% TCA and broken  
396 with glass beads using a Hybaid Ribolyser (3 cycle of 10 seconds with 3 minutes  
397 intervals in ice). 800 µl of TCA 5% was then added and the aqueous extract was spun  
398 at 4000 rpm for 10 min. Supernatant was removed and the pellet was resuspended in  
399 100 µl of 1x Laemmli buffer plus 50 µl of Tris 1 M. Tubes were then incubated at 95  
400 °C for 5 minutes and spun. Proteins were separated on 6% gels by SDS-PAGE. In  
401 order to increase the migration difference between phosphorylated and non-  
402 phosphorylated forms of Tea3, 5 µM of Phos-tag (Wako) and 200 µM of MnCl<sub>2</sub> were  
403 added to the gel as recommended by the manufacturer. To detect Tea3-GFP or  
404 untagged Tea3 an anti-GFP antibody (Roche) at 1:1000 dilution or a polyclonal anti-  
405 Tea3 antibody (kind gift of P. Nurse) at 1:2000 dilution were used.

406

#### 407 *Immunoprecipitation and phosphatase assay*

408 Cells expressing Tea3-GFP were cultivated overnight at 32 °C in yeast extract with  
409 supplements (YES (Moreno et al., 1991); rich medium). Harvested by centrifugation  
410 ( $OD_{562} < 0.8$ ), washed once with cold extraction buffer (EB: Tris 40 mM pH7.5, NaCl  
411 200 mM, KAcetate 50 mM, EDTA 1 mM,  $MgCl_2$  2 mM, Triton X-100 0.2%) and  
412 resuspended in cold EB containing phosphatase inhibitors ( $\beta$ -glycerophosphate 50  
413 mM, NaF 10 mM and NaO4V 1mM) and protease inhibitors (complete EDTA-free,  
414 Roche and PMFS 1 mM). Cells were broken with glass beads using a Hybaid  
415 Ribolyser (3 cycle of 10 seconds with 3 minutes intervals in ice). 5 mg of total  
416 proteins were mixed with 50  $\mu$ l of GFP-Trap magnetic beads and incubated at 4 °C  
417 for 2 hours. The beads were then washed 6 times with EB and resuspended in PMP  
418 buffer containing  $MnCl_2$  1 mM (NEB). The beads were split in half and treated or not  
419 with 3  $\mu$ l of  $\lambda$ -PPase (NEB) for 30 min at 30 °C. Beads were washed twice with EB  
420 and resuspended in Laemmli Buffer, heated at 95 °C for 5 min and loaded on a gel.

421

422 For Shk1-Tea3 co-immunoprecipitation strains expressing GFP-Shk1 were cultivated  
423 in YES medium at 32 C and harvested in log phase of growth. Cells were re-  
424 suspended in extraction buffer (Tris-HCl 50 mM pH7.5, NaCl 200 mM, Triton X-100  
425 0.1%, glycerol 10%, DTT 2 mM,  $\beta$ -glycerophosphate 50 mM, NaF 10 mM and  
426 NaO4V 1mM, protease inhibitors (complete EDTA-free, Roche) and PMSF 1 mM)  
427 and broken with glass beads using a Hybaid Ribolyser. 10 mg of total proteins were  
428 mixed with 50  $\mu$ l of GFP-Trap magnetic beads and incubated at 4 °C for 2 hours. The  
429 beads were then washed 6 times with washing buffer (Tris-HCl 50 mM, NaCl 150  
430 mM, Triton X-100 0.1% and DTT 5 mM), resuspended in Laemmli Buffer, heated at  
431 95 °C for 5 min and loaded on a gel.

432

433

434 *Protein purification*

435 6His-Tea3, 6His-Tea3-6A, 6His-Scd2-3HA and GST-Shk1 were expressed in *S.*  
436 *cerevisiae* (Geymonat et al., 2007). Ni-NTA agarose (Qiagen) and glutathione  
437 sepharose 4B (GE Healthcare) were used to purify 6His and GST tagged proteins  
438 respectively in accordance with the manufacturer protocols. Purified proteins were  
439 dialyzed o/n at 4 C in dialysis buffer (Tris-HCl 20 mM pH 7.5, NaCl 150 mM, DTT 2  
440 mM, glycerol 10%) and stored at -80 C. Typical protein concentration was: for Tea3  
441 and Tea3-6A, 0.5 µg/µl, for Shk1, 0.7 µg/µl and for Scd2, 0.2 µg/µl.

442

443 *In vitro binding and competition*

444 For in vitro Tea3/Shk1 or Scd2/Shk1 binding, strains M152 (expressing GST alone)  
445 and M150 (expressing GST-Shk1) were induced for 6 hours. Cells were re-suspended  
446 in breakage buffer (Bb: Tris-HCl 50 mM pH 7.5, NaCl 250 mM, Triton X-100 0.1%,  
447 DTT 5 mM, glycerol 10 %, EDTA 5 mM and protease inhibitors (complete EDTA-  
448 free, Roche and PMFS 1mM)). 10 mg of crude extract from each strain was then  
449 incubated with 70 µl of glutathione beads slurry previously washed in Bb without  
450 protease inhibitors for 2 hours at 4 C. Beads were then washed 6 times with washing  
451 buffer (Wb: Tris-HCl 50 mM pH 7.5, NaCl 250 mM, DTT 5 mM and Triton x-100  
452 0.2%) and one with binding buffer (Bb: Tris-HCl 30 mM pH 7.5, NaCl 150 mM,  
453 MgCl<sub>2</sub> 5 mM and DTT 1 mM). Beads were resuspended in 100 µl of Bb and 5 µg of  
454 6His-Tea3 or 6His-Scd2 were added to each tube. Tubes were incubated in agitation  
455 for 1.5 hours at RT then spun and the beads were washed 4 times with washing buffer  
456 (Wb2: Tris-Hcl 30 mM pH 7.5, NaCl 150 mM DTT 1mM and Triton X-100 0.1%).

457 Beads were then re-suspended in Laemli buffer and proteins analyzed by SDS-PAGE  
458 followed by Western blotting.

459

460 For in vitro competition between Scd2 and Tea3 for Shk1 binding, 250 µg of crude  
461 extract from strain M150 was used to purify GST-Shk1. GST-Shk1 beads were then  
462 incubated in Bb containing 1 µg of Tea3 alone or 1 µg of Tea3 and 10 µg of Scd2.

463 Beads were incubated in agitation for 1.5 hours at RT then spun and washed 4 times  
464 with Wb2. Bound proteins were analyzed by SDS-PAGE followed by Western  
465 blotting.

466

467 For in vitro competition between Tea3 and Scd2 for Shk1 binding, 250 µg of crude  
468 extract from strain M150 was used to purify GST-Shk1. GST-Shk1 beads were then  
469 washed once in kinase buffer (Kb: Hepes 50 mM pH 7.5, MgCl<sub>2</sub> 10 mM, MnCl<sub>2</sub> 1  
470 mM and DTT 1 mM) and then re-suspended in Kb containing 1 µg of Scd2 alone in  
471 presence or absence of 10 mM ATP or 1 µg of Scd2 and 10 µg of Tea3 in presence or  
472 absence of 10 mM ATP. Tubes were incubated for 45 minutes at 30 C with occasional  
473 agitation. Beads were washed 4 times with washing buffer (Wb3: Hepes 30 mM  
474 pH7.5, NaCl 150 mM, DTT 1 mM and Triton X-100 0.1%) and proteins were  
475 analyzed by SDS-PAGE followed by Western blotting.

476

#### 477 *In vitro kinase assay*

478 In order to detect phosphorylated Tea3 species we used the Pro-Q Diamond  
479 phosphoprotein gel stain (Invitrogen). Since the *S. cerevisiae* purified 6His-Tea3 is  
480 slightly phosphorylated and interferes with the Pro-Q staining, Tea3 was pre-treated  
481 with λ-PPase (NEB) and then re-purified. For the kinase assay 8 µg of de-

482 phosphorylated 6His-Tea3 and 12  $\mu\text{g}$  of GST-Shk1 were mixed in Kb containing  
483  $\text{Na}_3\text{O}_4\text{V}$  10 mM in presence or absence of 10 mM ATP. Kinase reaction was carried  
484 out for 2 hours at 30 C and then stopped by addition of Laemli buffer and incubation  
485 at 99 C for 5 minutes. Samples were analysed on SDS-PAGE and stained with Pro-Q  
486 Diamond following manufacturer instructions.

487

#### 488 *Imaging*

489 *S. pombe* strains were grown at 32 °C to exponential growth and aliquots of 300  $\mu\text{l}$   
490 cells were mounted onto 1.5 coverslip glass-bottom plastic dishes (MatTek; P35G-  
491 1.5-14-C) pre-coated with 10  $\mu\text{l}$  1 mg  $\text{ml}^{-1}$  lectin. After a 30-min incubation, cells  
492 unbound to the lectin-coated glass were removed by washing with medium, and  
493 bound cells were kept in a final suspension of 3 ml of medium. Imaging was  
494 performed with a DeltaVision System (Applied Precision, USA), based on an  
495 Olympus IX81 widefield microscope equipped with a CCD coolSNAP HQ<sup>2</sup> camera  
496 (Photometrix, USA), with a 60x/1.4 N.A. UPLSApo Oil objective. Images were  
497 captured and analyzed using SoftWoRx (Applied Precision). Unless otherwise stated,  
498 18 z-stacks with a step of 0.3  $\mu\text{m}$  were filmed with transmitted light and FITC/TRITC  
499 filters. Time-lapse images displayed and analyzed in Figure 4 were taken every 45  
500 seconds for 45 minutes.

501

502 The monopolarity or bipolarity of exponentially growing cells was determined using  
503 RFP-Bgs4 signal at one or both cell ends. Cell in septation or just after cytokinesis  
504 (prior to OETO) were not considered. At least 100 cells per condition were analyzed.  
505 Error bars represent standard deviation of 2 or 3 independent experiments. T-test was  
506 used to compare sets of results.

507

508 Quantification of GFP/RFP/mCherry signal was performed using Fiji  
509 (<http://fiji.sc/Fiji>) software after background subtraction. For Tea3-WT and Tea3-6A  
510 quantification at the cell ends the sum fluorescence of the cell area of 1.5  $\mu\text{m}$  from the  
511 ends have been calculated.

512

### 513 *Modelling*

514 We extended the original model of Csikász-Nagy et al. (Csikasz-Nagy et al., 2008)  
515 with an inhibitor that exists in cortical (*InhC*) and cytoplasmic (*Inh*) forms.  
516 Specifically, the equations of the original Csikász-Nagy model were duplicated  
517 leading to a system where both *Act* and a newly introduced *Inh* have similar  
518 autocatalytic cortical binding reactions that are facilitated by a cortical landmark  
519 protein (*u*). The cortical activator (*ActC*, originally named *f* in the Csikász-Nagy  
520 model) inhibits the autocatalytic cortical binding of the inhibitor, while the  
521 cytoplasmic inhibitor inhibits the autocatalytic cortical binding of the activator  
522 (Figure 5A). Thus the only difference between *Act* and *Inh* is in their dynamics and  
523 the way they are wired, with the cortical form of *Act* competing with *Inh*'s  
524 autocatalysis while the cytoplasmic form of *Inh* competes with *Act*'s autocatalysis.  
525 This leads to a situation where a negative feedback loop is introduced in the system  
526  $\text{ActC} \dashv \text{InhC} \dashv \text{Inh} \dashv \text{ActC}$ . Such systems with three negative effects can induce  
527 oscillations (Elowitz and Leibler, 2000) as shown in Figure 5-figure supplement 2.

528

529 The model is available as an annotated text file (Geymonat\_model\_final.ode,  
530 Supplementary File) that can be run directly as an .ode file in in the XPPAUT  
531 simulation software tool (<http://www.math.pitt.edu/~bard/xpp/xpp.html>). In the

532 legends of Figure 5 we provide the parameter changes required to obtain each result  
533 reported on Figure 5.

534

535 *Oscillation quantitations and automated microscopy analysis*

536 For the analysis of CRIB and Tea3 oscillations at cell ends, cells were segmented and  
537 tracked automatically using in-house algorithms implemented in Matlab.  
538 Photobleaching was corrected for each cell for each channel by assuming a constant  
539 fluorescence. Mean fluorescence at each cell end for each channel was computed by  
540 automatically defining the cell end geometrically, summing the pixels' greylevel  
541 values and dividing by the area. To look at the actual fluorescence  
542 fluctuations/oscillations, the continuous trend was removed using empirical mode  
543 decomposition (Huang et al., 1998). Assessment of the oscillatory nature of the signal  
544 was done in the same way as in (Das et al., 2012): autocorrelation of the signal at each  
545 cell end was computed and a given cell end signal was deemed oscillating if, from its  
546 starting point of 1, the fluorescence dipped below zero and went back up above 0.2;  
547 the period is then the time between two successive maxima. Interestingly, the Cdc42  
548 periodicity of 9 min obtained in this study differs from that describerreported in (Das  
549 et al., 2012), where a periodicity of 5 min was described. It is unclear exactly why the  
550 oscillation period differs between that study and ours, therefore we can only  
551 speculate. One plausible explanation could be the slight differences in the imaging  
552 protocols. In particular the temperature used during the imaging experiments might  
553 account for this discrepancy, given that all our imaging was done at a Room  
554 Temperature of  $\sim 21^{\circ}\text{C}$  and that paper reports a temperature for all experiments of  
555  $25^{\circ}\text{C}$ . It is possible to imagine biochemical rates of Cdc42 GTPase cycle could be  
556 temperature dependent. Other conditions, like optics and cell media, appear



557 comparable and are hence less likely to account for that discrepancy. Importantly, the  
558 oscillations of CRIB-mCherry and GFP-CRIB displayed the same period of ~9min in  
559 our experimental conditions (not shown). Hence, it is likely differences in the  
560 protocol, and not tagging, that underpins the discrepancy in the period of oscillation  
561 between the (Das et al., 2012) study and ours.

562

563 For Figure 4E, the cross-correlation plot between the green and red channel was  
564 computed for both cell ends for each cell and the density was plotted using kernel  
565 density estimation.

566

567 To score cell length at NETO (Figure 5E) cells were automatically segmented and  
568 tracked, and growth stage was assigned manually, as automated method lacked the  
569 required sensitivity given the low number of *tea3Δ* cells undergoing NETO.

570

#### 571 *Sample size & statistical testing*

572 Sample sizes are indicated in all figure legends. p-values were calculated using the t-  
573 test function in Microsoft Excel except in Figure 4D, where they were calculated  
574 using a two sample Kolmogorov-Smirnov test in Matlab.

575

576

577 **Author Contributions**

578 R.E.C.-S. conceived/led the project and R.E.C.-S. and M.G. designed the general  
579 experimental and computational strategy. M.G. carried out all experimental yeast  
580 work and imaging, with help from J.D. and H.P. A.C. carried out all quantitative  
581 image processing and analysis, with help from F.H. A.C.N. carried out all *in silico*  
582 modeling involved. R.E.C.-S. wrote the text with help from M.G. and other co-  
583 authors.

584

585 **Acknowledgements**

586 We thank E. Piddini, J. Moseley, D. Lew, T. Finegan, J. Pines, K. Sawin, F. Verde, S.  
587 Martin, J. Hayles, C. Bradshaw, F. Vaggi and the Carazo Salas group for help and  
588 comments, M. Sato, P. Perez, D. Young. P. Nurse and S. Marcus for *S. pombe* strains,  
589 P. Zegerman for kind gift of Phos-tag, A. Sossick and N. Lawrence for assistance with  
590 imaging, and E. Piddini, D. Lew, J. Mata, J. Moseley and the Carazo Salas group for  
591 critical reading of the manuscript. This work was supported by an European Research  
592 Council (ERC) Starting Researcher Investigator Grant (R.E.C.-S.; SYSGRO), a  
593 Human Frontier Science Program (HFSP) Young Investigator Grant (R.E.C.-S., A.C.-  
594 N.; HFSP RGY0066/2009-C), a Biological Sciences Research Council (BBSRC)  
595 Responsive Mode grant (R.E.C.-S.; BB/K006320/1) and an Isaac Newton Trust  
596 research grant (R.E.C.-S.; 10.44(n)).

597

598 **Competing interests**

599 The authors declare no financial or non-financial competing interests.

600

601

602 **References**

- 603 Abenza, J.F., Couturier, E., Dodgson, J., Dickmann, J., Chessel, A., Dumais, J., and  
604 Carazo Salas, R.E. (2015). Wall mechanics and exocytosis define the shape of growth  
605 domains in fission yeast. *Nature communications* 6, 8400.
- 606 Arellano, M., Niccoli, T., and Nurse, P. (2002). Tea3p is a cell end marker activating  
607 polarized growth in *Schizosaccharomyces pombe*. *Curr Biol* 12, 751-756.
- 608 Beltrao, P., Trinidad, J.C., Fiedler, D., Roguev, A., Lim, W.A., Shokat, K.M.,  
609 Burlingame, A.L., and Krogan, N.J. (2009). Evolution of phosphoregulation:  
610 comparison of phosphorylation patterns across yeast species. *PLoS biology* 7,  
611 e1000134.
- 612 Bendezu, F.O., and Martin, S.G. (2012). Cdc42 oscillations in yeasts. *Science*  
613 signaling 5, pe53.
- 614 Bendezu, F.O., Vincenzetti, V., Vavylonis, D., Wyss, R., Vogel, H., and Martin, S.G.  
615 (2015). Spontaneous Cdc42 polarization independent of GDI-mediated extraction and  
616 actin-based trafficking. *PLoS biology* 13, e1002097.
- 617 Bretscher, A., Edwards, K., and Fehon, R.G. (2002). ERM proteins and merlin:  
618 integrators at the cell cortex. *Nat Rev Mol Cell Biol* 3, 586-599.
- 619 Carpy, A., Krug, K., Graf, S., Koch, A., Popic, S., Hauf, S., and Macek, B. (2014).  
620 Absolute proteome and phosphoproteome dynamics during the cell cycle of fission  
621 yeast. *Mol Cell Proteomics*.
- 622 Chang, E., Bartholomeusz, G., Pimental, R., Chen, J., Lai, H., Wang, L., Yang, P.,  
623 and Marcus, S. (1999). Direct binding and In vivo regulation of the fission yeast p21-  
624 activated kinase shk1 by the SH3 domain protein scd2. *Molecular and cellular biology*  
625 19, 8066-8074.

626 Cortes, J.C., Carnero, E., Ishiguro, J., Sanchez, Y., Duran, A., and Ribas, J.C. (2005).  
627 The novel fission yeast (1,3)beta-D-glucan synthase catalytic subunit Bgs4p is  
628 essential during both cytokinesis and polarized growth. *J Cell Sci* 118, 157-174.

629 Csikasz-Nagy, A., Gyorffy, B., Alt, W., Tyson, J.J., and Novak, B. (2008). Spatial  
630 controls for growth zone formation during the fission yeast cell cycle. *Yeast* 25, 59-  
631 69.

632 Das, M., Drake, T., Wiley, D.J., Buchwald, P., Vavylonis, D., and Verde, F. (2012).  
633 Oscillatory dynamics of Cdc42 GTPase in the control of polarized growth. *Science*  
634 337, 239-243.

635 Das, M., Nunez, I., Rodriguez, M., Wiley, D.J., Rodriguez, J., Sarkeshik, A., Yates,  
636 J.R., 3rd, Buchwald, P., and Verde, F. (2015). Phosphorylation-dependent inhibition  
637 of Cdc42 GEF Gef1 by 14-3-3 protein Rad24 spatially regulates Cdc42 GTPase  
638 activity and oscillatory dynamics during cell morphogenesis. *Molecular biology of the*  
639 *cell* 26, 3520-3534.

640 Dodgson, J., Chessel, A., Yamamoto, M., Vaggi, F., Cox, S., Rosten, E., Albrecht, D.,  
641 Geymonat, M., Csikasz-Nagy, A., Sato, M., *et al.* (2013). Spatial segregation of  
642 polarity factors into distinct cortical clusters is required for cell polarity control.  
643 *Nature communications* 4, 1834.

644 Elowitz, M.B., and Leibler, S. (2000). A synthetic oscillatory network of  
645 transcriptional regulators. *Nature* 403, 335-338.

646 Fievet, B.T., Gautreau, A., Roy, C., Del Maestro, L., Mangeat, P., Louvard, D., and  
647 Arpin, M. (2004). Phosphoinositide binding and phosphorylation act sequentially in  
648 the activation mechanism of ezrin. *J Cell Biol* 164, 653-659.

649 Foiani, M., Marini, F., Gamba, D., Lucchini, G., and Plevani, P. (1994). The B  
650 subunit of the DNA polymerase alpha-primase complex in *Saccharomyces cerevisiae*

651 executes an essential function at the initial stage of DNA replication. *Mol Cell Biol*  
652 *14*, 923-933.

653 Garcia, P., Tajadura, V., Garcia, I., and Sanchez, Y. (2006). Role of Rho GTPases and  
654 Rho-GEFs in the regulation of cell shape and integrity in fission yeast. *Yeast* *23*,  
655 1031-1043.

656 Geymonat, M., Spanos, A., and Sedgwick, S.G. (2007). A *Saccharomyces cerevisiae*  
657 autoselection system for optimised recombinant protein expression. *Gene* *399*, 120-  
658 128.

659 Gierer, A., and Meinhard, H. (1972). Theory of Biological Pattern Formation.  
660 *Kybernetik* *12*, 30-39.

661 Goryachev, A.B., and Pokhilko, A.V. (2008). Dynamics of Cdc42 network embodies  
662 a Turing-type mechanism of yeast cell polarity. *FEBS letters* *582*, 1437-1443.

663 Hipfner, D.R., Keller, N., and Cohen, S.M. (2004). Slik Sterile-20 kinase regulates  
664 Moesin activity to promote epithelial integrity during tissue growth. *Genes Dev* *18*,  
665 2243-2248.

666 Hirao, M., Sato, N., Kondo, T., Yonemura, S., Monden, M., Sasaki, T., Takai, Y., and  
667 Tsukita, S. (1996). Regulation mechanism of ERM (ezrin/radixin/moesin)  
668 protein/plasma membrane association: possible involvement of phosphatidylinositol  
669 turnover and Rho-dependent signaling pathway. *J Cell Biol* *135*, 37-51.

670 Huang, N.E., Shen, Z., Long, S.R., Wu, M.L.C., Shih, H.H., Zheng, Q.N., Yen, N.C.,  
671 Tung, C.C., and Liu, H.H. (1998). The empirical mode decomposition and the Hilbert  
672 spectrum for nonlinear and non-stationary time series analysis. *Proceedings of the*  
673 *Royal Society a-Mathematical Physical and Engineering Sciences* *454*, 903-995.

- 674 Huang, T.Y., Markley, N.A., and Young, D. (2003). Nak1, an essential germinal  
675 center (GC) kinase regulates cell morphology and growth in *Schizosaccharomyces*  
676 *pombe*. *J Biol Chem* 278, 991-997.
- 677 Huisman, S.M., and Brunner, D. (2011). Cell polarity in fission yeast: a matter of  
678 confining, positioning, and switching growth zones. *Semin Cell Dev Biol* 22, 799-  
679 805.
- 680 Kelly, F.D., and Nurse, P. (2011). Spatial control of Cdc42 activation determines cell  
681 width in fission yeast. *Molecular biology of the cell* 22, 3801-3811.
- 682 Kissil, J.L., Johnson, K.C., Eckman, M.S., and Jacks, T. (2002). Merlin  
683 phosphorylation by p21-activated kinase 2 and effects of phosphorylation on merlin  
684 localization. *J Biol Chem* 277, 10394-10399.
- 685 Knaus, U.G., Heyworth, P.G., Evans, T., Curnutte, J.T., and Bokoch, G.M. (1991).  
686 Regulation of phagocyte oxygen radical production by the GTP-binding protein Rac  
687 2. *Science* 254, 1512-1515.
- 688 Kuo, C.C., Savage, N.S., Chen, H., Wu, C.F., Zyla, T.R., and Lew, D.J. (2014).  
689 Inhibitory GEF Phosphorylation Provides Negative Feedback in the Yeast Polarity  
690 Circuit. *Curr Biol* 24, 753-759.
- 691 Matsuyama, A., Arai, R., Yashiroda, Y., Shirai, A., Kamata, A., Sekido, S.,  
692 Kobayashi, Y., Hashimoto, A., Hamamoto, M., Hiraoka, Y., *et al.* (2006). ORFeome  
693 cloning and global analysis of protein localization in the fission yeast  
694 *Schizosaccharomyces pombe*. *Nat Biotechnol* 24, 841-847.
- 695 Mitchison, J.M., and Nurse, P. (1985). Growth in cell length in the fission yeast  
696 *Schizosaccharomyces pombe*. *J Cell Sci* 75, 357-376.
- 697 Moreno, S., Klar, A., and Nurse, P. (1991). Molecular genetic analysis of fission yeast  
698 *Schizosaccharomyces pombe*. *Methods Enzymol* 194, 795-823.

699 Nakamura, F., Amieva, M.R., and Furthmayr, H. (1995). Phosphorylation of  
700 threonine 558 in the carboxyl-terminal actin-binding domain of moesin by thrombin  
701 activation of human platelets. *J Biol Chem* 270, 31377-31385.

702 Neisch, A.L., Formstecher, E., and Fehon, R.G. (2013). Conundrum, an ARHGAP18  
703 orthologue, regulates RhoA and proliferation through interactions with Moesin. *Mol*  
704 *Biol Cell* 24, 1420-1433.

705 Niccoli, T., Arellano, M., and Nurse, P. (2003). Role of Tea1p, Tea3p and Pom1p in  
706 the determination of cell ends in *Schizosaccharomyces pombe*. *Yeast* 20, 1349-1358.

707 Novak, B., and Tyson, J.J. (2008). Design principles of biochemical oscillators.  
708 *Nature reviews Molecular cell biology* 9, 981-991.

709 Pietromonaco, S.F., Simons, P.C., Altman, A., and Elias, L. (1998). Protein kinase C-  
710 theta phosphorylation of moesin in the actin-binding sequence. *J Biol Chem* 273,  
711 7594-7603.

712 Qyang, Y., Yang, P., Du, H., Lai, H., Kim, H., and Marcus, S. (2002). The p21-  
713 activated kinase, Shk1, is required for proper regulation of microtubule dynamics in  
714 the fission yeast, *Schizosaccharomyces pombe*. *Mol Microbiol* 44, 325-334.

715 Rincon, S.A., Estravis, M., and Perez, P. (2014). Cdc42 regulates polarized growth  
716 and cell integrity in fission yeast. *Biochemical Society transactions* 42, 201-205.

717 Rothbauer, U., Zolghadr, K., Muyldermans, S., Schepers, A., Cardoso, M.C., and  
718 Leonhardt, H. (2008). A versatile nanotrap for biochemical and functional studies  
719 with fluorescent fusion proteins. *Mol Cell Proteomics* 7, 282-289.

720 Rupes, I., Jia, Z., and Young, P.G. (1999). Ssp1 promotes actin depolymerization and  
721 is involved in stress response and new end take-off control in fission yeast. *Mol Biol*  
722 *Cell* 10, 1495-1510.

723 Shaw, R.J., Paez, J.G., Curto, M., Yaktine, A., Pruitt, W.M., Saotome, I., O'Bryan,  
724 J.P., Gupta, V., Ratner, N., Der, C.J., *et al.* (2001). The Nf2 tumor suppressor, merlin,  
725 functions in Rac-dependent signaling. *Dev Cell* 1, 63-72.

726 Snaith, H.A., Samejima, I., and Sawin, K.E. (2005). Multistep and multimode cortical  
727 anchoring of tea1p at cell tips in fission yeast. *Embo J* 24, 3690-3699.

728 Snaith, H.A., and Sawin, K.E. (2003). Fission yeast mod5p regulates polarized growth  
729 through anchoring of tea1p at cell tips. *Nature* 423, 647-651.

730 Speck, O., Hughes, S.C., Noren, N.K., Kulikauskas, R.M., and Fehon, R.G. (2003).  
731 Moesin functions antagonistically to the Rho pathway to maintain epithelial integrity.  
732 *Nature* 421, 83-87.

733 Thadani, R., Huang, D., and Oliferenko, S. (2011). Robust polarity specification  
734 operates above a threshold of microtubule dynamicity. *Cytoskeleton (Hoboken)* 68,  
735 290-299.

736 Turing, A.M. (1952). The Chemical Basis of Morphogenesis. *Philosophical*  
737 *Transactions of the Royal Society of London Series B-Biological Sciences* 237, 37-  
738 72.

739 Wilson-Grady, J.T., Villen, J., and Gygi, S.P. (2008). Phosphoproteome analysis of  
740 fission yeast. *Journal of proteome research* 7, 1088-1097.

741 Yonemura, S., Matsui, T., and Tsukita, S. (2002). Rho-dependent and -independent  
742 activation mechanisms of ezrin/radixin/moesin proteins: an essential role for  
743 polyphosphoinositides in vivo. *J Cell Sci* 115, 2569-2580.

744

745



746 **Figures**

747 **Figure 1. Tea3 is a local inhibitor of Cdc42 activity at growing cell domains.**

748 **(A)** Left, A Tea3-GFP RFP-Bgs4 co-expressing cell imaged every 10 minutes and the  
749 main polarized growth transitions (OETO, NETO and septation) it undergoes. Middle,  
750 Fluorescence intensity profiles of Tea3 (green) and Bgs4 (red) along the cell axis  
751 during those transitions. Right, Tea3 (green) and Bgs4 (red) maximal fluorescence  
752 intensities at the ‘old end’ and ‘new end’ through the cell cycle. Note that Tea3  
753 counter-mirrors growth. **(B)** Quantification of maximal Scd1-GFP and Scd2-GFP  
754 fluorescence at growing end of monopolar wild-type (WT), *rgf1Δ* and *tea3Δ* cells co-  
755 expressing Scd1-GFP or Scd2-GFP and RFP-Bgs4 cells (n>50 cells/condition). **(C)**  
756 Images of monopolar wild-type (WT), *rgf1Δ* and *tea3Δ* cells co-expressing Scd2-GFP  
757 and RFP-Bgs4. **(D)** Quantification of maximal RFP-Bgs4 fluorescence at growing end  
758 of monopolar wild-type (WT) and *tea3Δ* cells co-expressing Scd1-GFP and RFP-  
759 Bgs4 cells (n>50 cells/condition). **(E)** Images of cells co-expressing Tea3-GBP-  
760 mCherry and Rga4-GFP or Cdr2-GFP. Arrows denote lack of Tea3-GBP-mCherry at  
761 the new cell end in the presence of Rga4-GFP or Cdr2-GFP; arrowhead denotes  
762 relocalisation of Tea3-GBP-mCherry to the cell middle in the presence of Cdr2-GFP.  
763 **(F)** Proportion of monopolar and bipolar cells in exponential cultures with indicated  
764 genotypes. Septated cells and cells prior to OETO have not been considered. Average  
765 of 2 independent experiments with n>150 cells/condition. Error bars represent ± SD.  
766 Scalebars: 5µm.

767

768

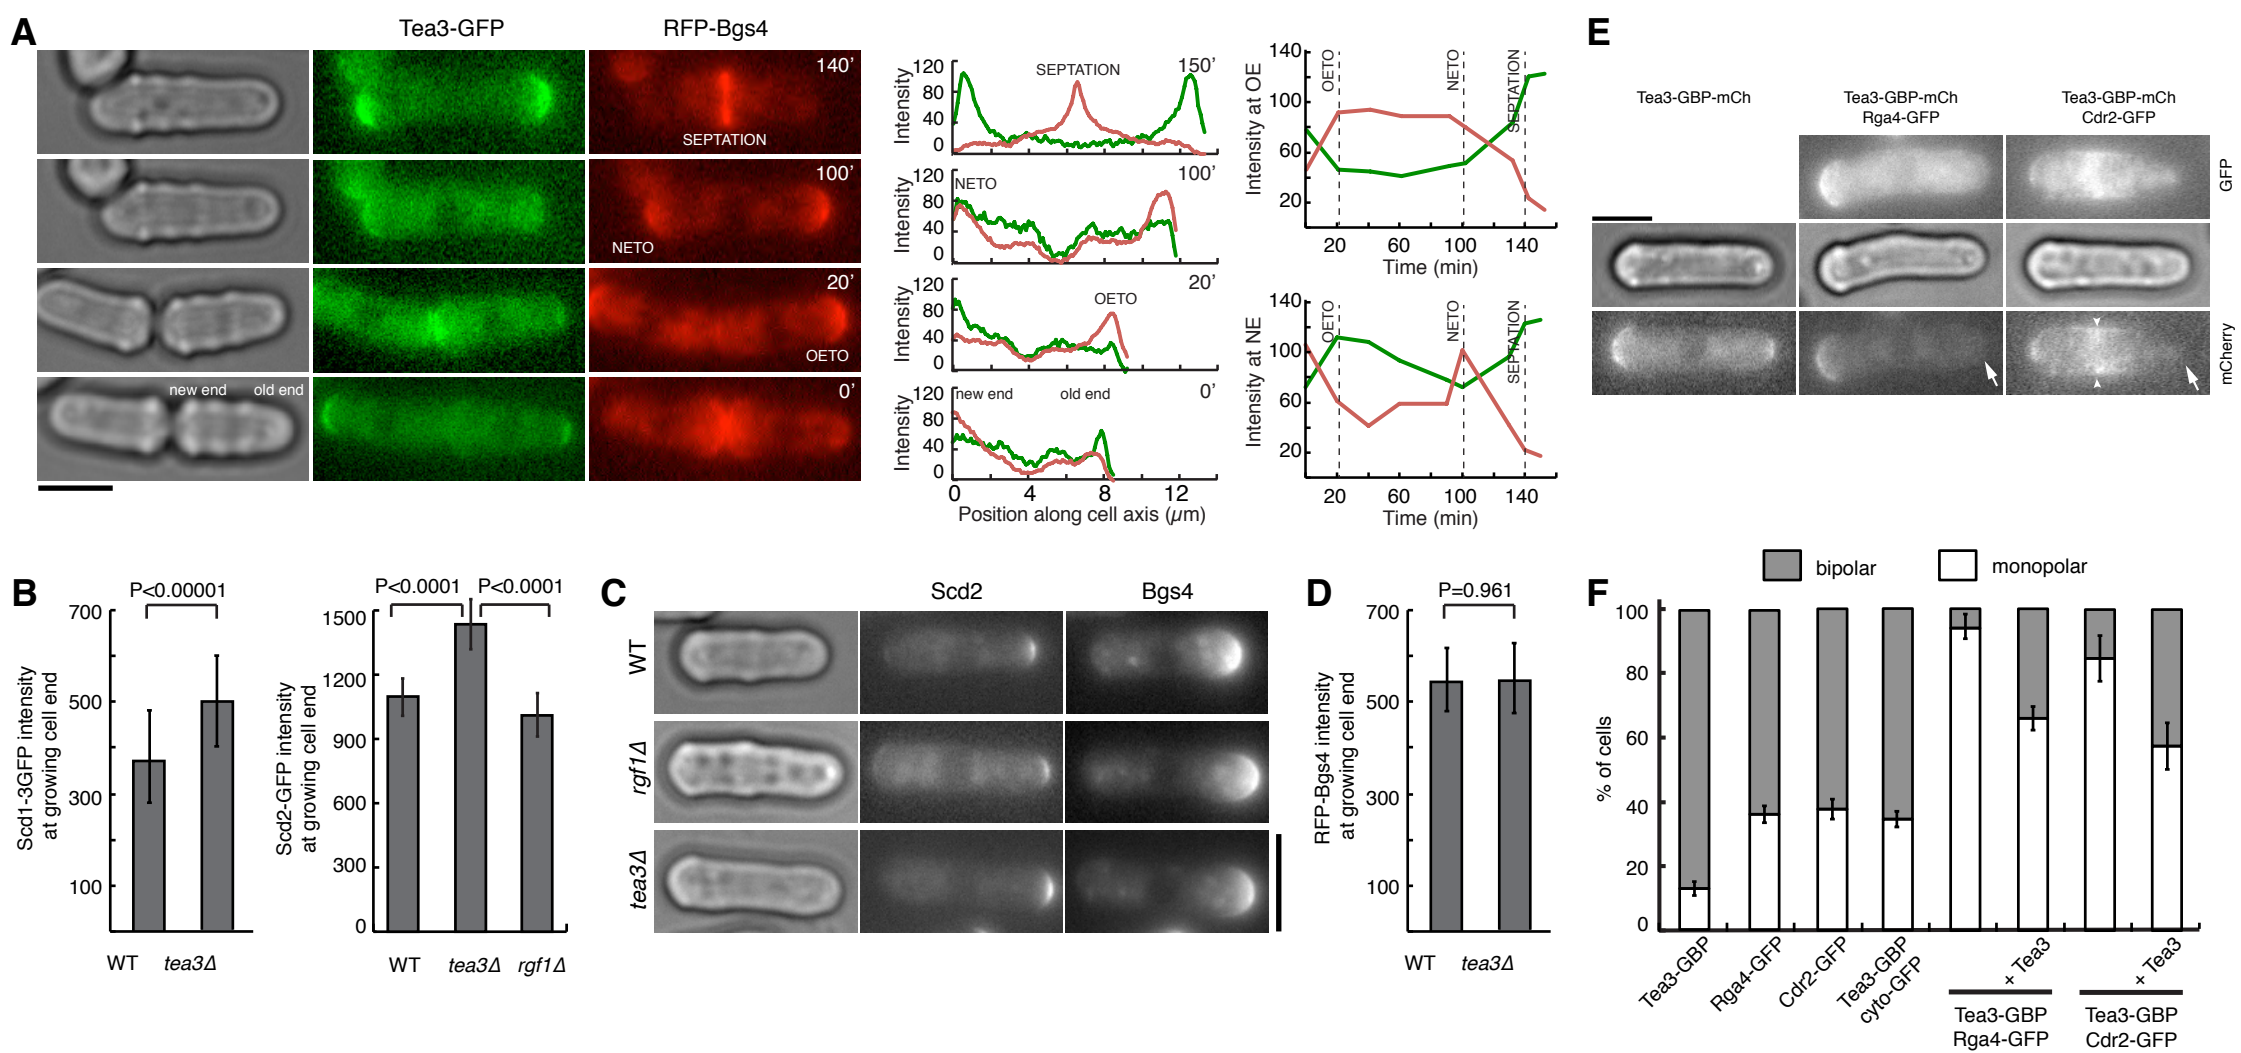

770 **Figure 1-figure supplement 1**

771 **(A)** Quantification of the Tea3-GBP localisation at the growing and non-growing cell  
772 ends in cells expressing Tea3-GBP-mCherry alone or in combination with Rga4-GFP  
773 or Cdr2-GFP. n=20 cells per condition. Error bars represent  $\pm$  SD. **(B)** Images of cells  
774 expressing Tea3-GBP and cytosolic GFP. Cell end localisation of the GFP can be  
775 observed in cells with a septum, where concentration of Tea3 is high at the cell ends,  
776 but not in bipolar cells where concentration of Tea3 at the cell ends is low. **(C)**  
777 Quantification of the intensity of Cdr2-GFP and Rga4-GFP at the non-growing cell  
778 ends in strains expressing Tea3-GBP alone or in combination with Tea3-ProA. n=20  
779 cells per condition. Error bars represent  $\pm$  SD. **(D)** Western blot of crude extract  
780 derived from strains RCS517, M146 and M147, to show the expression of the Tea3-  
781 ProA allele. The upper part of the blot has been probed with a Rabbit Peroxidase anti-  
782 Peroxidase antibody (Sigma P1291) and the lower part with a monoclonal anti-tubulin  
783 antibody. **(E, F)** Quantification of the intensity of Scd2-GFP in WT **(E)** and *tea3 $\Delta$*  **(F)**  
784 cells in monopolar cells plotted versus the length of the cell. The data demonstrate  
785 that there is no increased concentration of Scd2-GFP in longer monopolar cells.

786

787

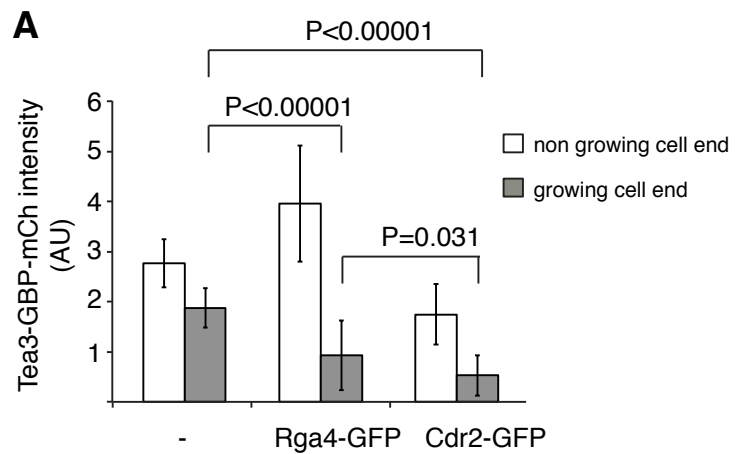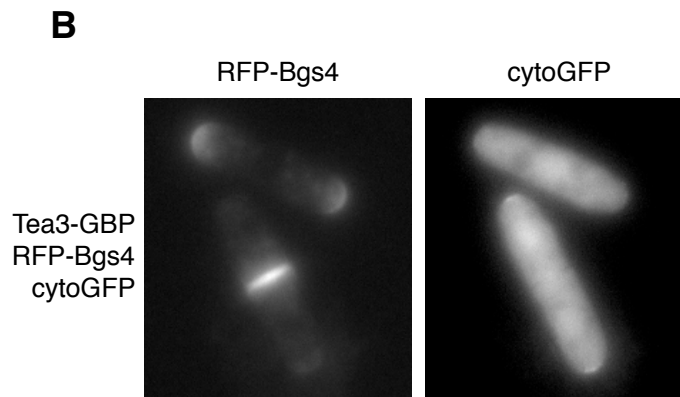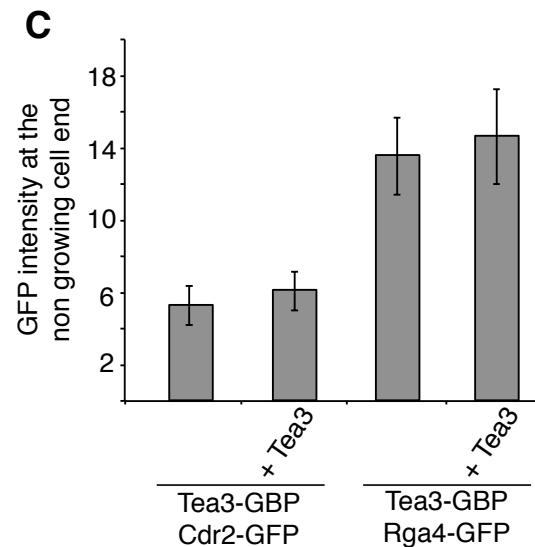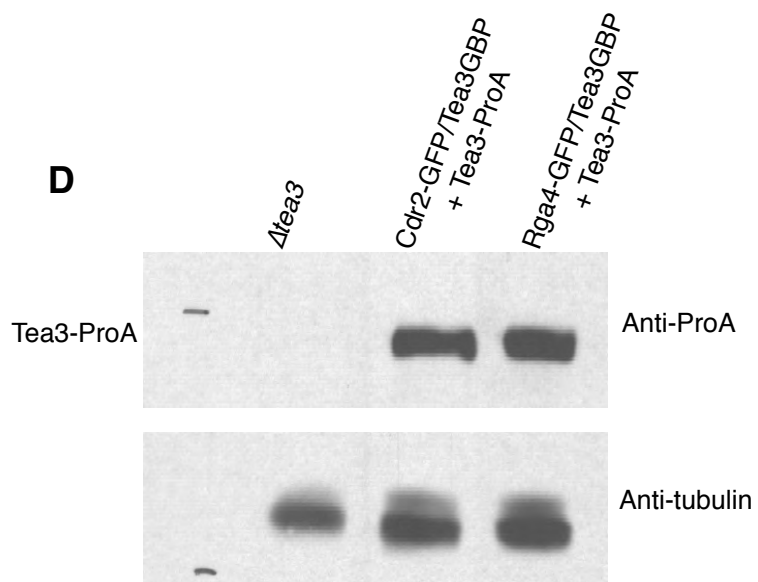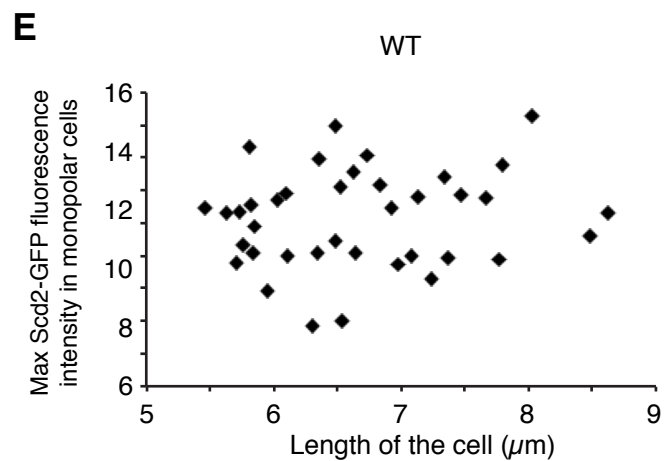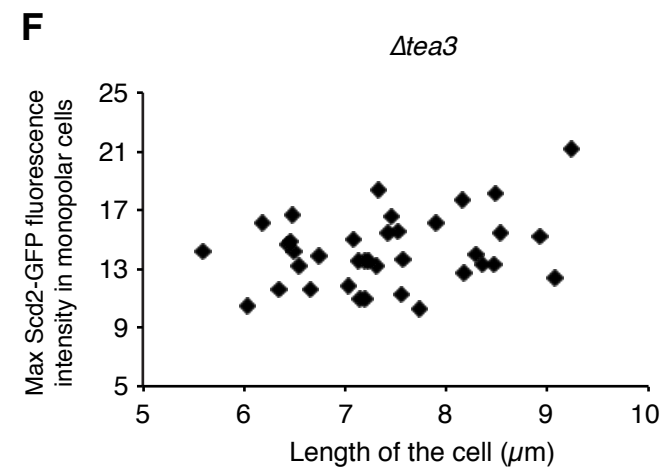

789 **Figure 2. Tea3 function is phosphorylation-dependent and under control by the**  
790 **PAK kinase Shk1.**

791 **(A)** Anti-GFP antibody Western blot of Tea3-GFP immunoprecipitated from Tea3-  
792 GFP-expressing cycling (left), *cdc10-129* G1-arrested (middle) and *cdc25-22* G2-  
793 arrested (right) cells, treated with or without  $\lambda$ -PPase. **(B)** Anti-GFP antibody Western  
794 blot of Tea3-GFP from cells of the indicated backgrounds. **(C)** Anti-Tea3 antibody  
795 Western blot from cells of the indicated backgrounds. Phos-tag containing 6%  
796 acrylamide gel. **(D)** Quantification of Tea3-GFP and Tea3-6A-GFP fluorescence  
797 intensity at the cell ends in monopolar, bipolar and septating cells, classified based on  
798 their RFP-Bgs4 localization (n>50 cells/condition were measured except bipolar  
799 Tea3-6A-GFP cells where n=20, as they were very rare; error bars represent  $\pm$  SD).  
800 **(E)** Example images of cells used for the quantifications in D. Arrows indicate bipolar  
801 cells. **(F)** Relative percentages of monopolar and bipolar cells in the cell lines  
802 indicated. Average of 2 experiments with n>130 cells/condition. Error bars represent  
803  $\pm$  SD. Scalebars: 5 $\mu$ m.

804

805

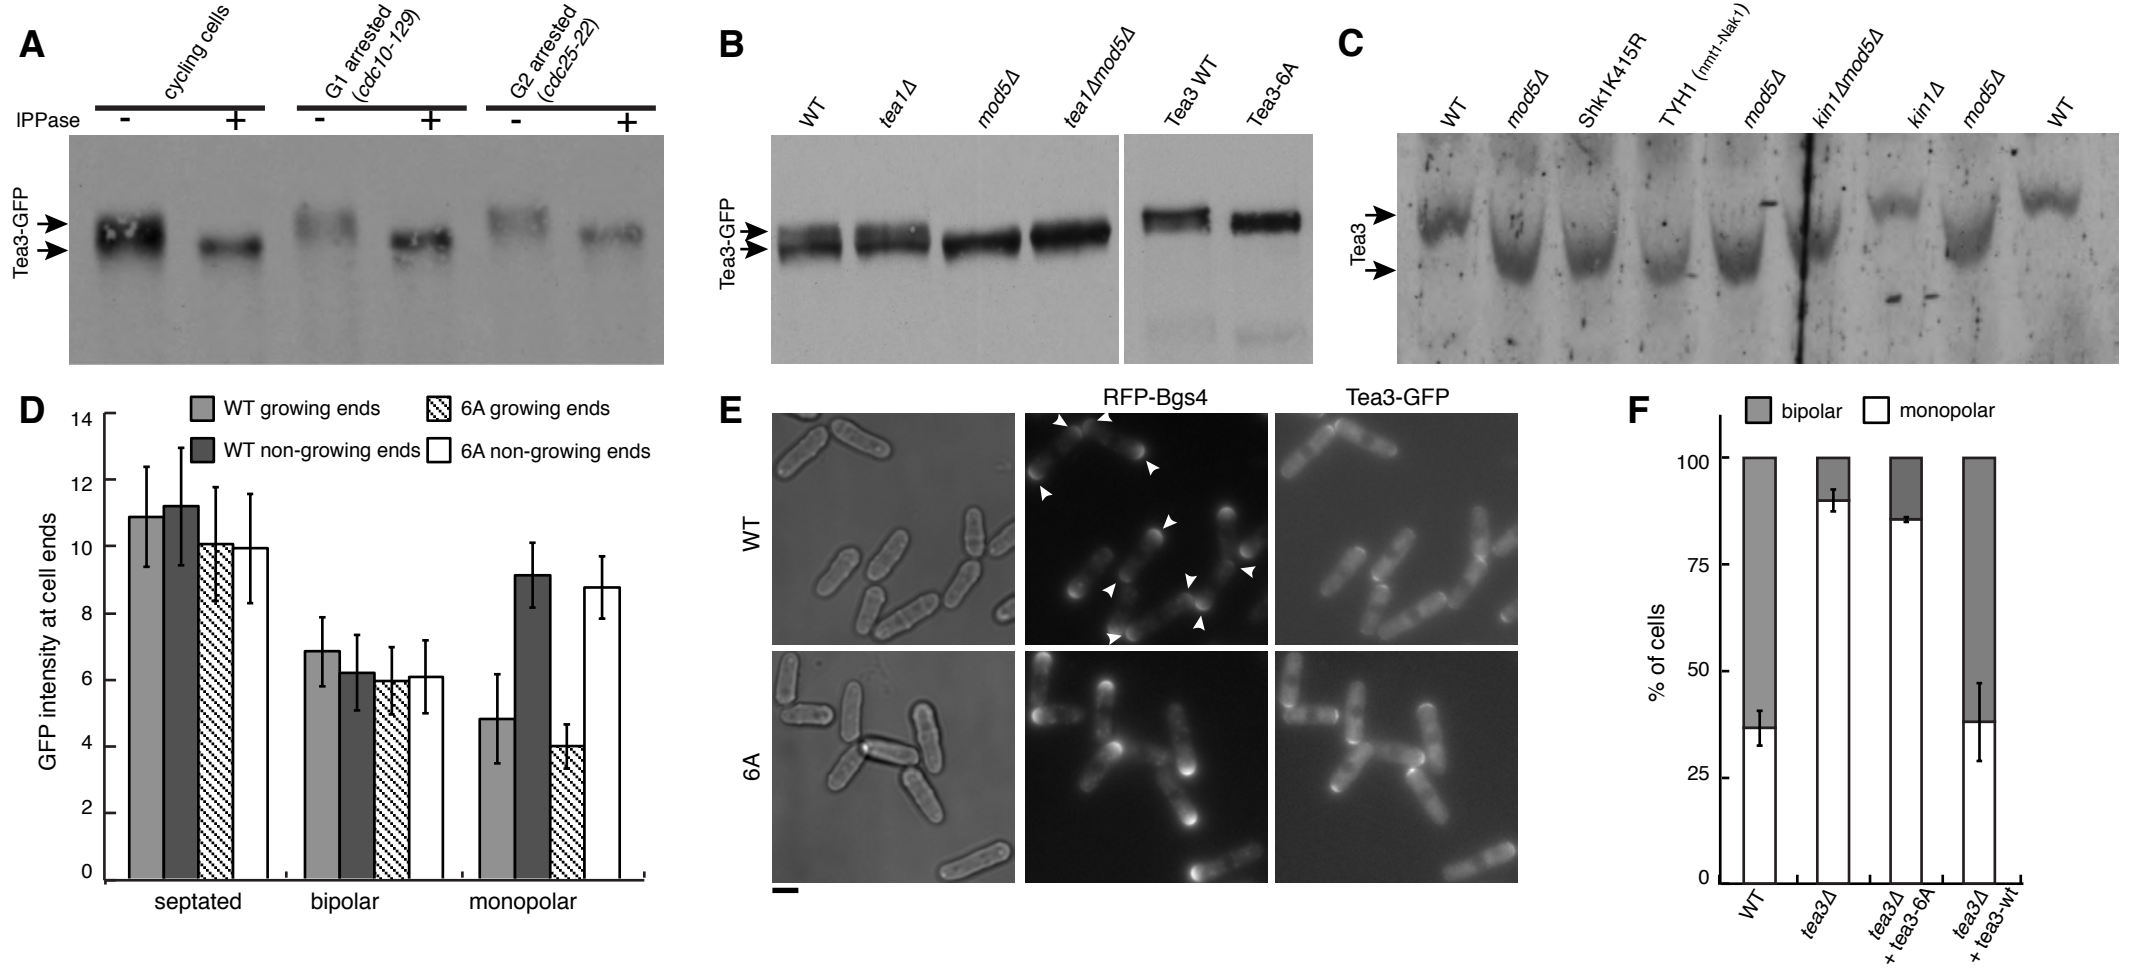

807 **Figure 2-figure supplement 1**

808 Cell cycle arrest and release of the strain RCS312 (*cdc25-22*, *Tea3-GFP*). Cells were  
809 arrested for 3h at 37 °C then released at 23 °C. Samples of cells were taken every 15  
810 minutes for TCA extraction and septum staining. Upper panel: septation index during  
811 time. Lower panel: SDS-PAGE (6% acrylamide) of crude extract stained with an anti-  
812 GFP antibody.

813

814

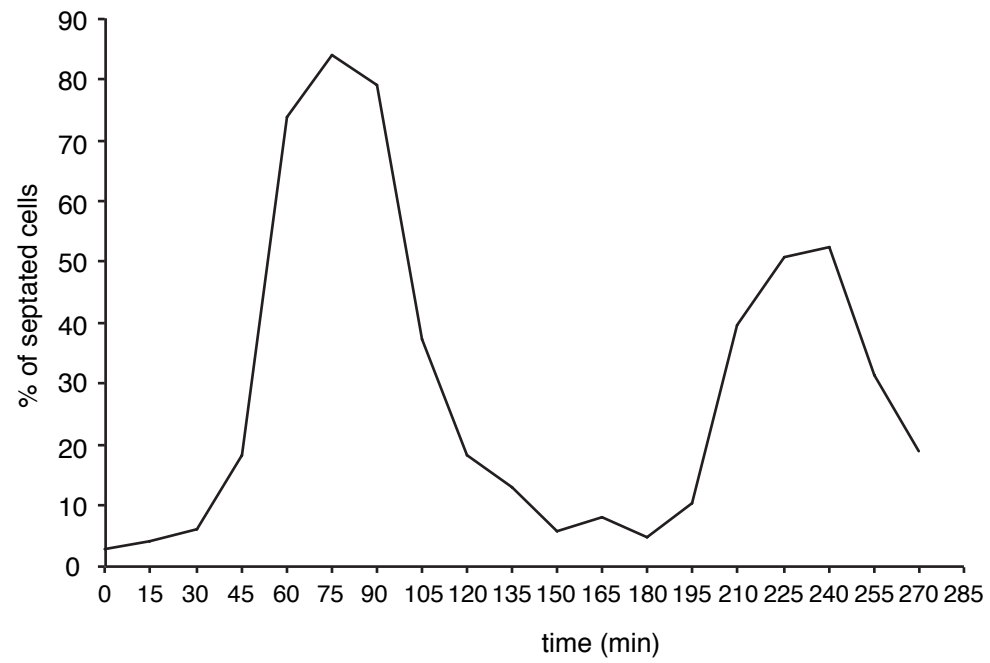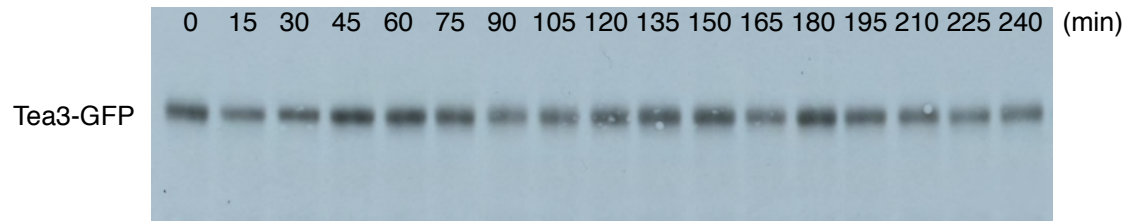



816 **Figure 2-figure supplement 2**

817 The expression of Tea3WT-GFP and Tea3-6A-GFP is comparable. 70  $\mu$ g of crude  
818 extract from exponentially growing M7 and M37 cells were run on a gel and stained  
819 with anti-GFP (upper panel) or anti-tubulin (lower panel) antibody.

820

821

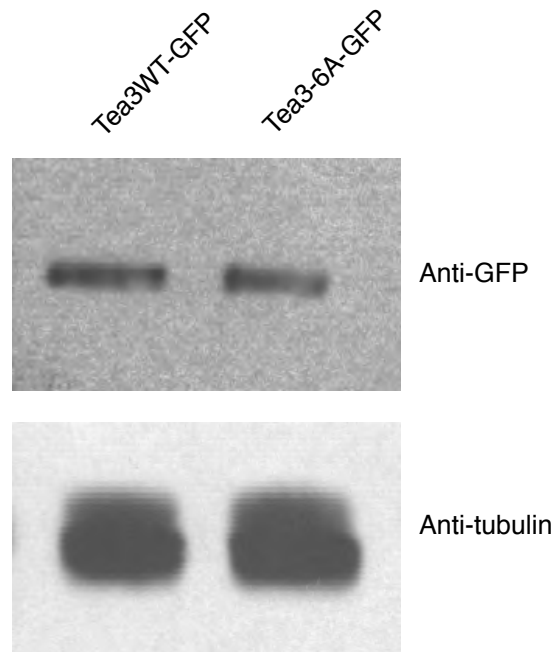

823 **Figure 3. Tea3 is a substrate of Shk1 *in vitro* and it competes with Scd2 for Shk1**  
824 **binding *in vitro* and *in vivo***

825 **(A)** Purified 6His-Tea3 binds specifically to GST-Shk1. GST only and GST-Shk1  
826 beads incubated with purified 6His-Tea3 were subjected to SDS-PAGE and Western  
827 blot analysis. Upper panel, WB decorated with anti-6His; lower panel SDS-PAGE  
828 stained with Blue Coomassie. **(B)** 6His-Tea3 is an *in vitro* substrate of Shk1. Purified  
829 6His-Tea3 is incubated in absence (left) or presence (right) of 10 mM ATP with  
830 purified GST-Shk1. Proteins are subjected to SDS-PAGE and stained before with Pro-  
831 Q diamond (Thermo Fisher) to detect phosphor proteins (upper panel) and then with  
832 Blue Coomassie (lower panel). **(C)** Purified 6His-Scd2-3HA binds specifically to  
833 GST-Shk1. GST only and GST-Shk1 beads incubated with purified 6His-Scd2-3HA  
834 were subjected to SDS-PAGE and Western blot analysis. Upper panel, WB decorated  
835 with anti-HA; lower panel SDS-PAGE stained with Blue Coomassie. **(D)** Scd2  
836 competes with Tea3 for Shk1 binding. 6His-Tea3/GST-Shk1 complex bound to  
837 glutathione beads is incubated with or without 10x excess of 6His-Scd2-3HA. After  
838 extensive washing proteins are analysed by SDS-PAGE and western blotting. Upper  
839 panel, anti-Tea3 (note that this antibody recognize also GST), middle panel Blue  
840 Coomassie, lower panel anti-HA. **(E)** Tea3 competes with Scd2 for Shk1 binding in  
841 an ATP-dependent manner. 6His-Scd2-3HA/GST-Shk1 complex bound to glutathione  
842 beads is incubated with or without 10x excess of 6His-Tea3 in presence or absence of  
843 10 mM ATP. After extensive washing proteins are analysed by SDS-PAGE and  
844 western blotting. Upper panel, Blue Coomassie, lower panel anti-HA. **(F)** Tea3-6A  
845 cannot compete with Scd2 for Shk1 binding. 6His-Scd2-3HA/GST-Shk1 complex  
846 bound to glutathione beads is incubated with or without 10x excess of 6His-Tea3-6A  
847 in presence or absence of 10 mM ATP. After extensive washing proteins are analysed

848 by SDS-PAGE and western blotting. Upper panel, Blue Coomassie, lower panel anti-  
849 HA. **(G)** Quantification of maximal Scd2-GFP fluorescence intensity at the growing  
850 ends of monopolar cells expressing wild-type Tea3 (Tea3-WT) or Tea3-6A (n=50  
851 cells for each sample). Error bars represent  $\pm$  SD. **(H)** Tea3-GFP and RFP-Bgs4  
852 localization in WT and *scd2Δ* cells. Quantification of maximal Tea3-GFP  
853 fluorescence at growing end of monopolar WT and *scd2Δ* cells (n=35 cells). Error  
854 bars represent  $\pm$  SD. **(I)** Scd2 competes with Tea3 for Shk1 binding in vivo. GFP-  
855 Shk1 is immunoprecipitated with nano-trap magnetic beads (Chromo Tech) in WT,  
856 GFP-Shk1 and GFP-Shk1  $\Delta$ scd2 strains. Immunoprecipitated proteins are subjected to  
857 SDS-PAGE and Western blotting using anti-Tea3 (upper panel) and anti-GFP (lower  
858 panel) to detect Tea3 and FGP-Shk1 respectively.

859

860

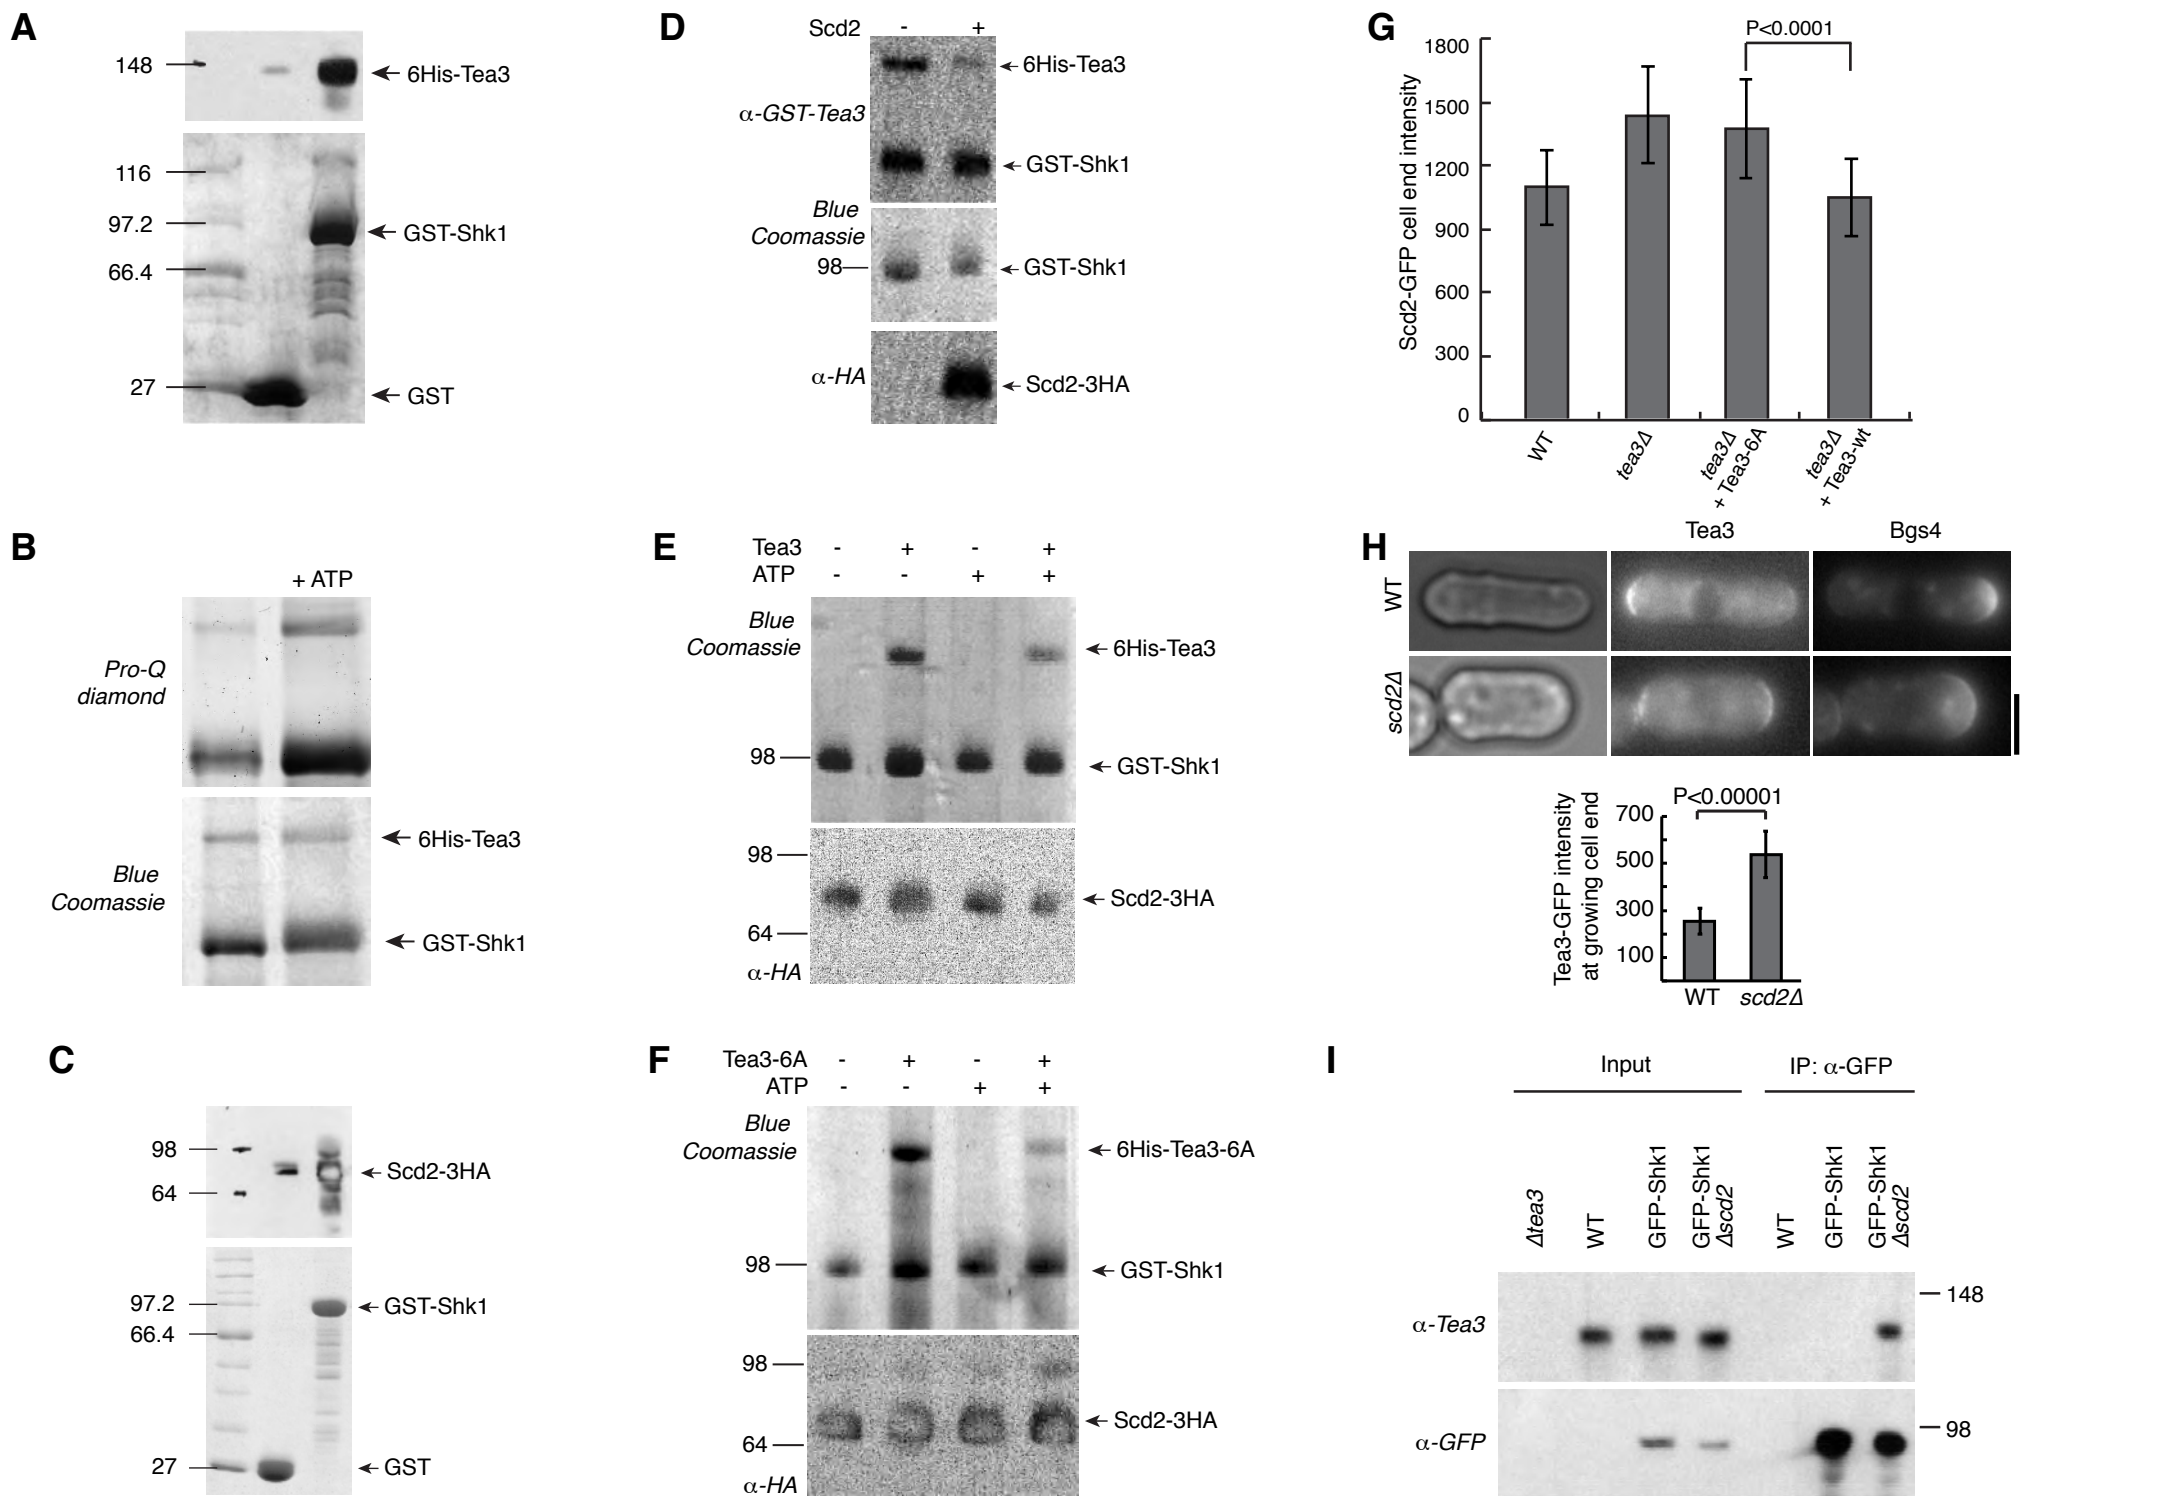

Geymonat et al. Figure 3

862 **Figure 4. Tea3 is integral part of the mechanism that controls cortical GTP-**  
863 **Cdc42 oscillations in fission yeast**

864 **(A)** Previously described oscillatory behavior of GTP-Cdc42 at cell ends (Das et al.,  
865 2012), as observed using a CRIB-mCherry reporter, and newly observed oscillatory  
866 behaviour of Tea3, observed via a GFP fusion. Left, timelapse fluorescence images of  
867 a CRIB-mCherry Tea3-GFP co-expressing cell (note: 0' corresponds to the same real  
868 timepoint in both top/bottom image sequences). Arrowheads indicate protein  
869 enrichment at alternating cell ends. Right, manual quantitation of raw CRIB-mCherry  
870 and Tea3-GFP signals from the cell shown on the left. Light and dark coloured lines  
871 represent the fluorescence at each of the two cell ends. Note: the CRIB-mCherry and  
872 Tea3-GFP image sequences and signals are from the same cell. **(B)** Left, Example of  
873 automatically quantitated CRIB-mCherry fluorescence intensity profiles for the two  
874 ends of a cell. Right, autocorrelation of each of the two cell end signals (light/dark  
875 coloured lines) and cross-correlation between the signals (black line), showing a clear  
876 CRIB-mCherry pattern of oscillation between the two cell ends. **(C)** Left, Example of  
877 automatically quantitated Tea3-GFP fluorescence intensity profiles from the two ends  
878 of a cell. Right: autocorrelation of each of the two cell end signals (light/dark  
879 coloured lines) and cross-correlation between the signals (black line), showing a  
880 Tea3-GFP pattern of oscillation between the two cell ends. **(D)** Distribution of CRIB  
881 oscillation period values in wild-type (top left, n=202) and *tea3Δ* (bottom left, n=56)  
882 cells. Right: statistical significance of the difference in CRIB oscillation period  
883 between wild-type and *tea3Δ* cells. **(E)** Density plot of the cross-correlation between  
884 the Tea3 and CRIB signals measured in the same cell at opposite cell ends, in a  
885 population of n=202 tracked cells co-expressing CRIB-mCherry and Tea3-GFP. Note  
886 that the density is not centered around zero (which would signify uncorrelation),

887 indicating that the CRIB and Tea3 signal oscillations in a given cell are coupled. **(F)**

888 Schematic model of the Shk1-dependent, Scd2-antagonizing role of Tea3 in

889 controlling activation of polarized cellular growth by locally inhibiting polarity.

890

891

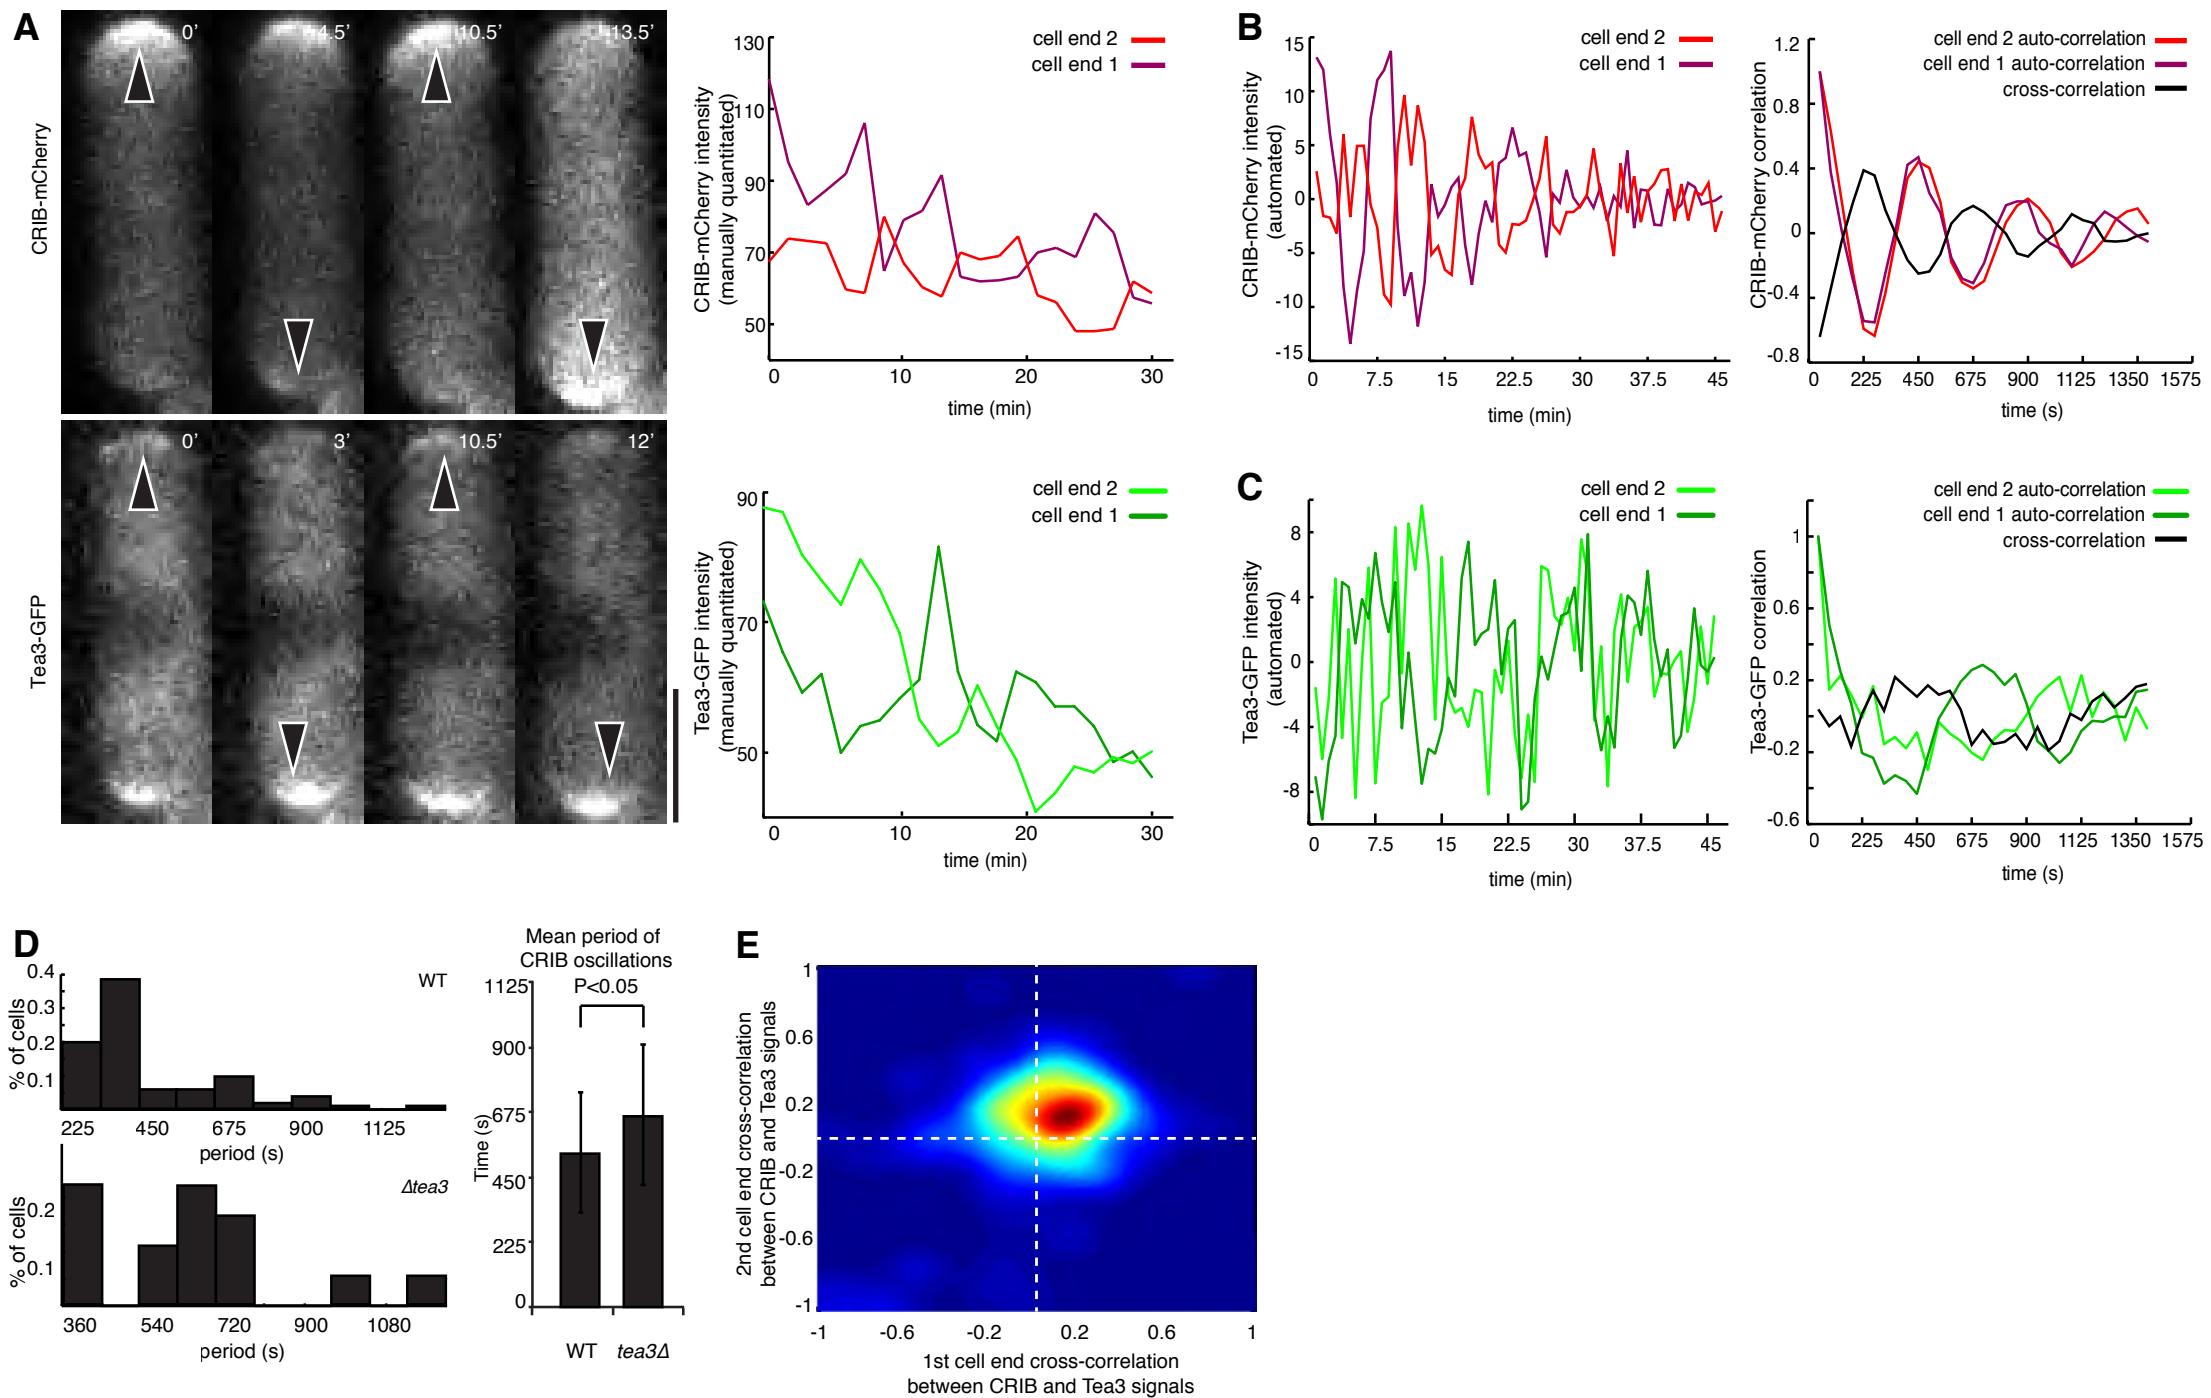



893 **Figure 5. A Cdc42 activator-inhibitor antagonistic system simultaneously**  
894 **accounts for fission yeast polarized growth patterns and Cdc42-oscillations *in***  
895 ***silico*.**

896 **(A)** An activator–inhibitor model of polarity establishment in fission yeast cells.  
897 Cdc42-GTP is controlled by an antagonistic ‘activator’ and ‘inhibitor’ pair, which are  
898 freely diffusible and retained at cell ends by microtubule-transported landmarks.  
899 Cortical, slow-diffusing activator ActC forms autocatalytically from fast diffusing  
900 Act. Similarly, slow-diffusing inhibitor InhC helps its own formation from faster  
901 diffusing Inh. The autocatalytic reactions are mediated by polarity ‘landmark’  
902 proteins and ActC inhibits the InhC feedback loop, while Inh inhibits the ActC  
903 feedback loop. **(B)** Distribution of ActC and InhC in a 1-dimensional simulated cell.  
904 ActC becomes bipolar when the length of the cell reaches 11.3  $\mu\text{m}$  and undergoes  
905 NETO. The majority of InhC is localized at the non-growing (i.e. low Act) old end of  
906 the cell pre-NETO. OE: old end; NE: new end. **(C)** Average level of total Act and Inh  
907 in the 20% outermost region of the old and new ends of the cell in **(B)**. **(D)** Removal  
908 of the inhibitory effect of Inh on ActC autocatalysis ( $k_4'=0\text{min}^{-1}$ ), as a proxy of *tea3 $\Delta$* .  
909 Act level increases at the OE and NETO happens when cells reach a longer length of  
910 14.9  $\mu\text{m}$ . **(E)** The experimentally observed size of cells at NETO is statistically bigger  
911 in *tea3 $\Delta$*  cells than in wild-type cells, as predicted by the model ( $n>200$   
912 cells/condition; p-value  $<0.00005$ ). **(F)** Removal of the inhibitory effect of ActC on  
913 InhC autocatalysis ( $k_6'=0\text{min}^{-1}$ ), as a proxy of *scd2 $\Delta$* . Inh level increases at the OE  
914 and NETO happens when cells reach a longer length of 14.7  $\mu\text{m}$ . **(G)** Increase in the  
915 background polymerization rate of Inh ( $k_5'=40\text{min}^{-1}$ ) causes delay in NETO,  
916 happening at a length of 13.9  $\mu\text{m}$ . **(H)** Increase in the background polymerization rate  
917 of Act ( $k_3'=6.9\text{min}^{-1}$ ) causes advance in NETO, happening at a length of 9.15  $\mu\text{m}$ . **(I)**

918 Mimicked increase in Tea3 and Scd2 polymerization rates by inducing  
919 oligomerization of the GFP-labelled proteins, using an oligomer-inducing 3GBP  
920 construct confirm the timing of bipolar switch (n=200 cells/condition). **(J)**  
921 Perturbation in the degradation rate of Inh ( $k_{dInh}=0.15\text{min}^{-1}$ ) induces oscillations in  
922 Act between the two cell ends. **(K)** The period of this oscillation is lengthened if Inh  
923 cannot efficiently inhibit Act autocatalysis ( $k_4'=70\text{min}^{-1}$ ); the total removal of the  
924 effect of Inh would kill oscillations leading to a simulation as on panel **(D)**.  
925  
926

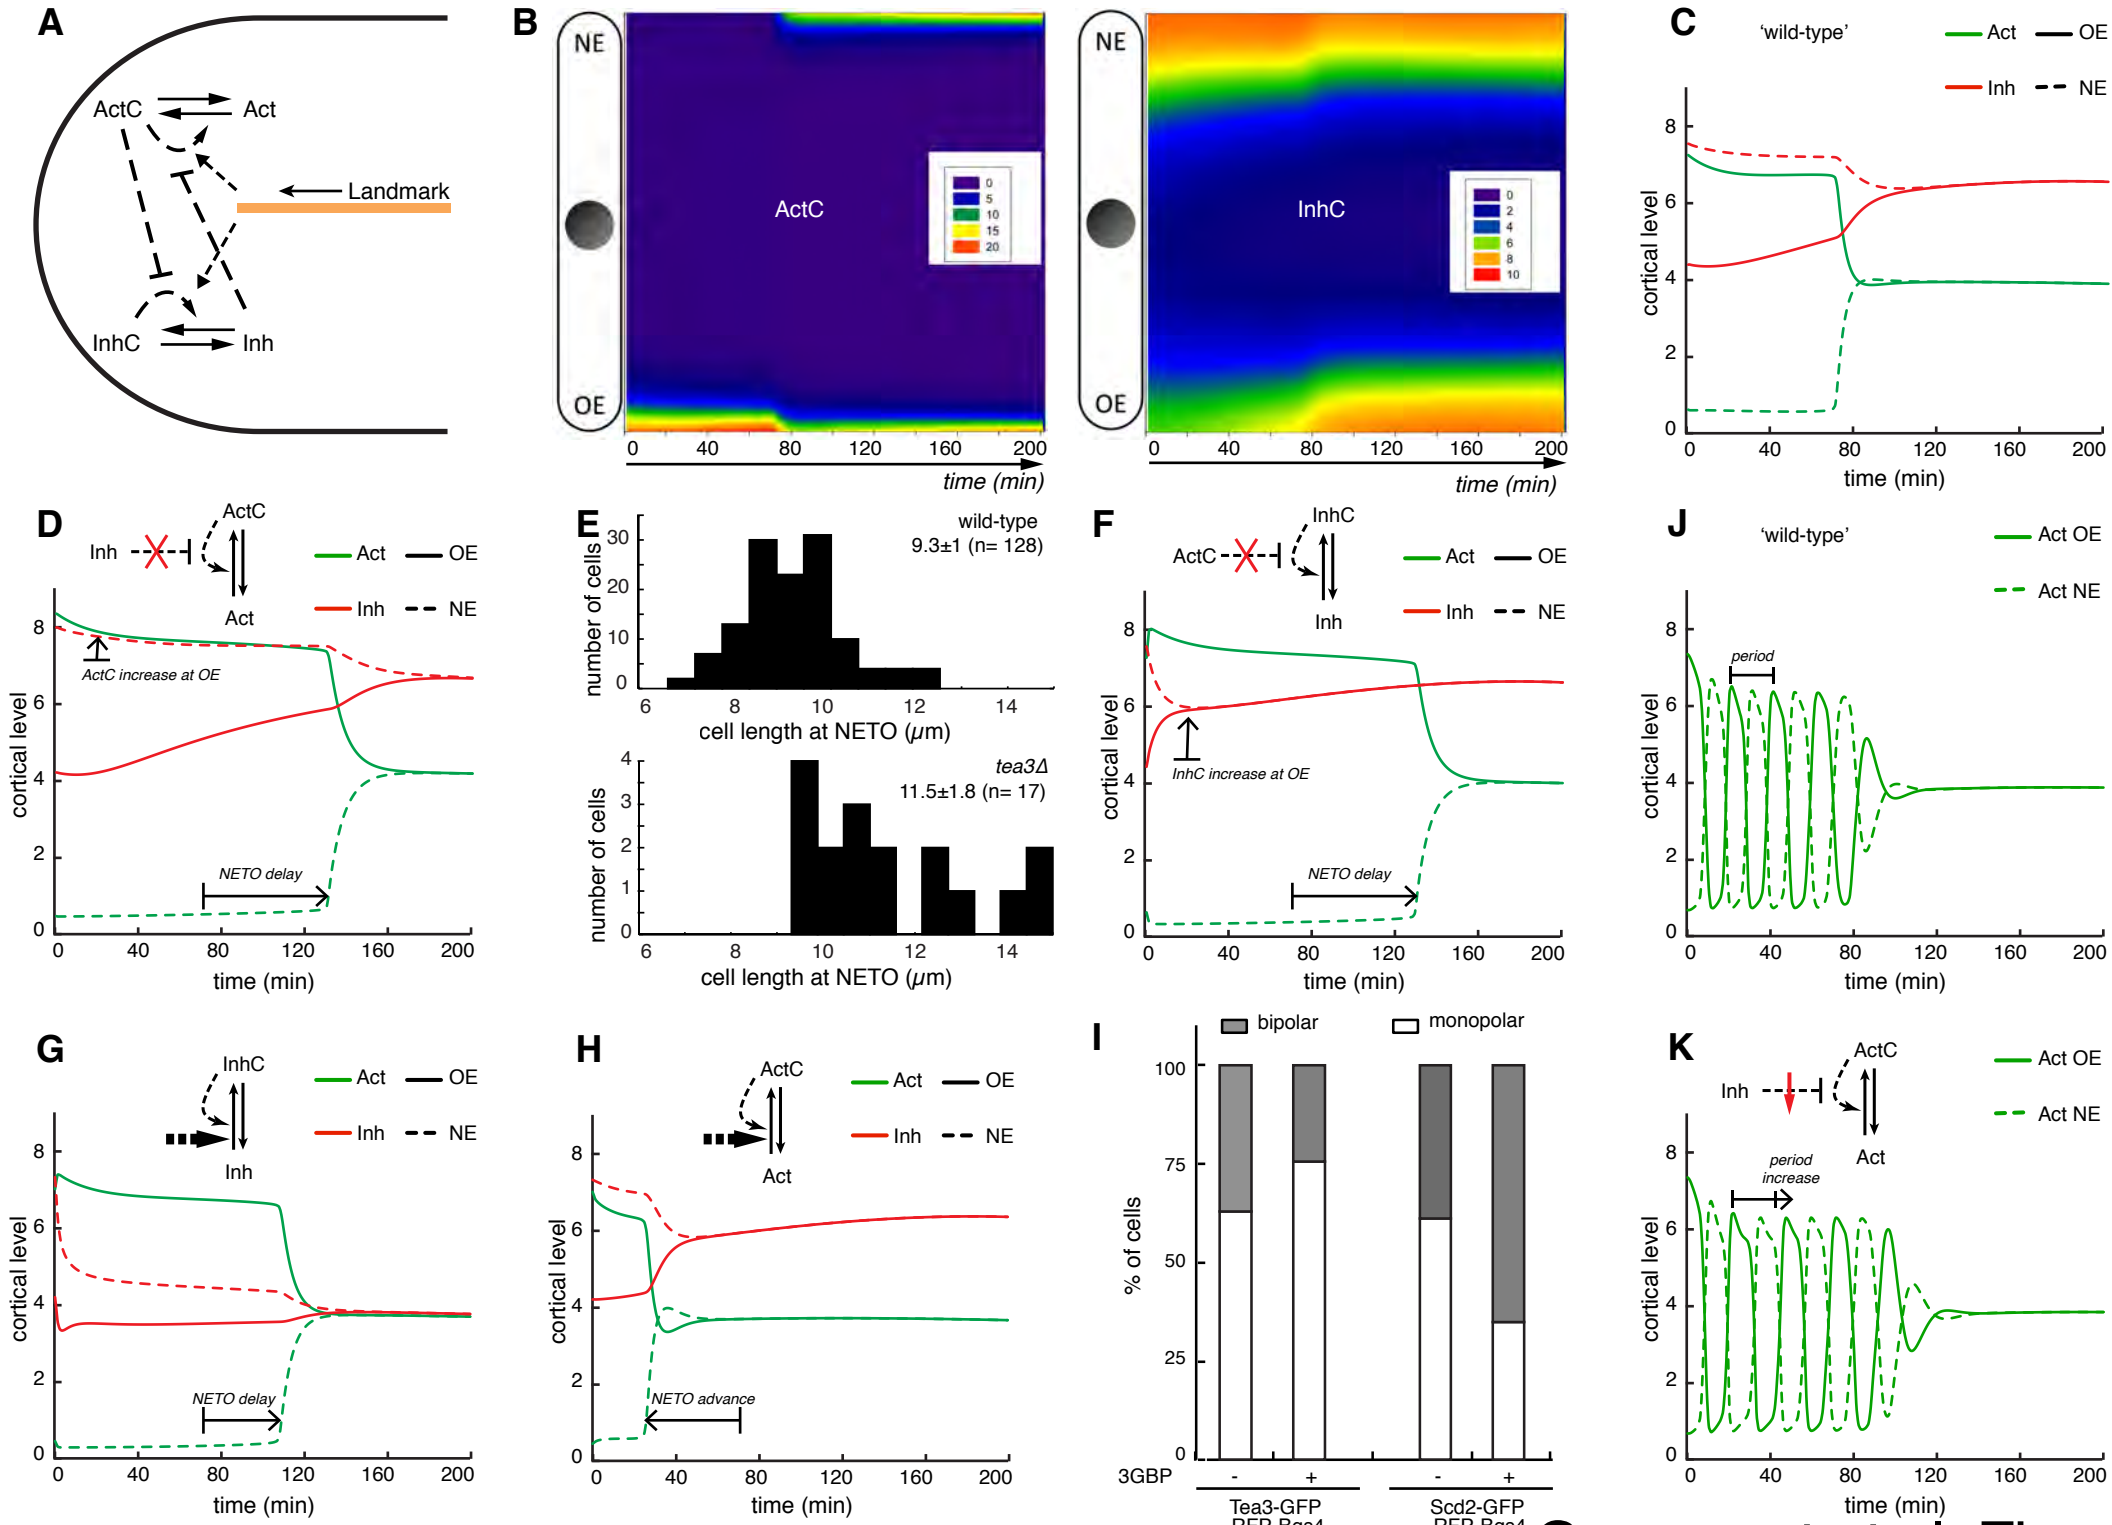

Geymonat et al. Figure 5

928 **Figure 5-figure supplement 1**

929 **(A)** Tea3 oligomerises *in vivo*. Tea3-GFP was immunoprecipitated from strains  
930 PN556 and M156 with GFP-Trap magnetic beads. After extensive washing bound  
931 proteins were analysed by SDS-PAGE and Western blotting using anti Tea3 antibody.  
932 Immunoprecipitated Tea3-GFP from strain M156 (expressing also the WT allele of  
933 Tea3) is able to co-purify untagged Tea3 demonstrating the ability of Tea3 to  
934 oligomerise. **(B)** FRAP experiments using strains RCS763 and RCS774. The  
935 photobleached area was half of the cell end (cortical) or inside the cytoplasm  
936 (cytoplasmic). For the cortical FRAP, the recovery of fluorescence in the bleached  
937 half of the cell end was followed for 1 minute with measurements every 1 second. For  
938 the cytoplasmic FRAP, the recovery was followed for 3.7 seconds with measurements  
939 every 54 milliseconds. The results show that there are 2 species of Tea3 and Scd2,  
940 one highly dynamic in the cytoplasm and another one less dynamic associated to the  
941 cortex.

942

943

944

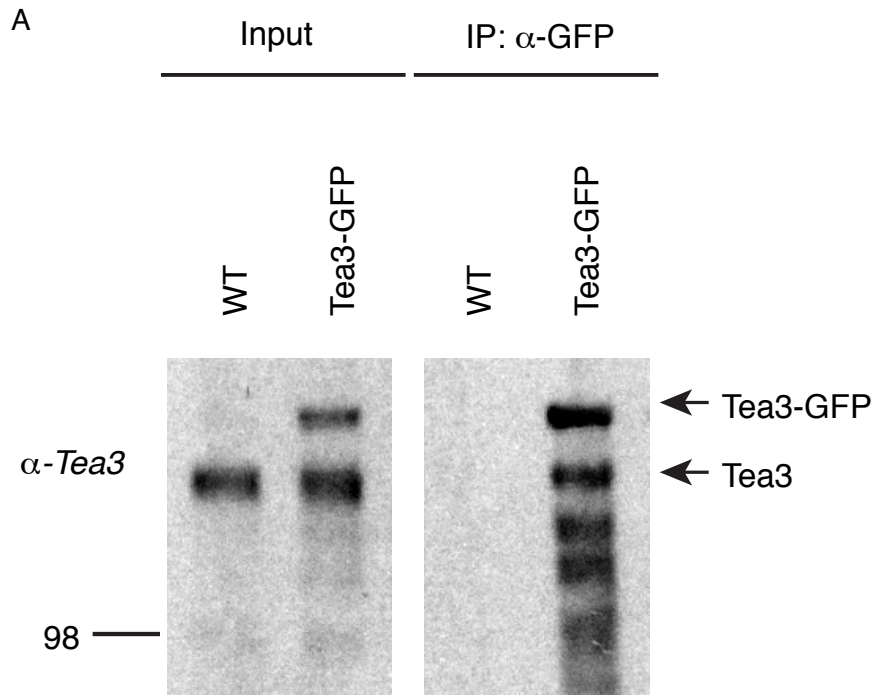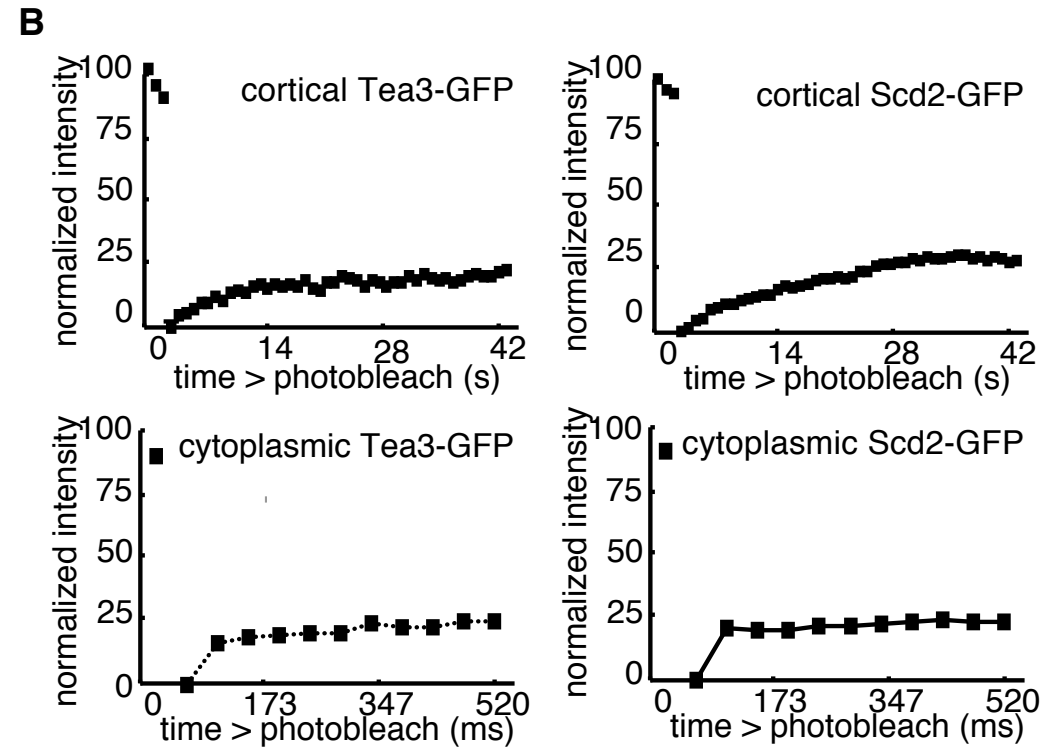

946 **Figure 5-figure supplement 2**

947 Simulations of oscillations in ActC and InhC levels when the original parameters are  
948 perturbed. **(A, B)** Small changes in the degradation ( $k_{dInh} = 0.15\text{min}^{-1}$ ) or diffusion  
949 ( $D_{Inh} = 240\mu\text{m}^2/\text{min}$ ) rates of the Tea3-like inhibitor ‘Inh’ can induce oscillations in  
950 the cortical enrichment of both inhibitor and activator.

951

952

**A** 3-fold higher  $\text{Inh}_{\text{degradation}}$

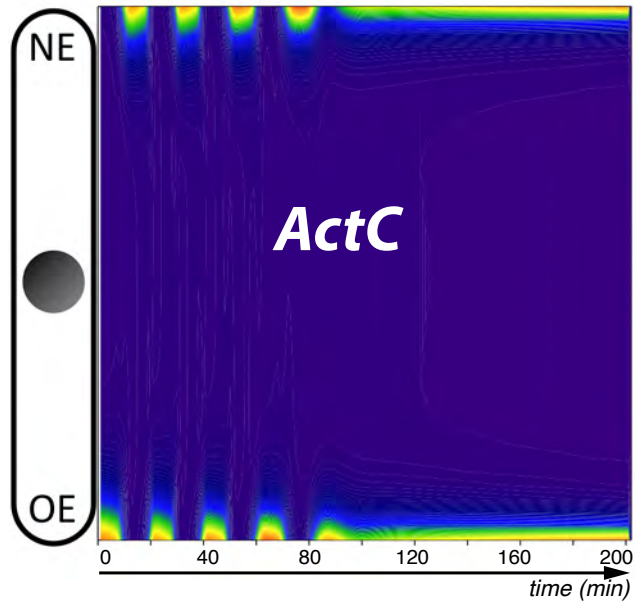

**B** 3-fold higher  $\text{Inh}_{\text{diffusion}}$

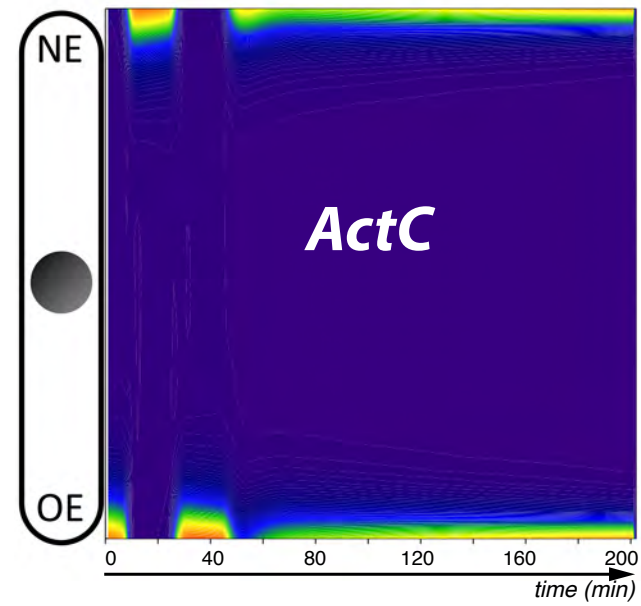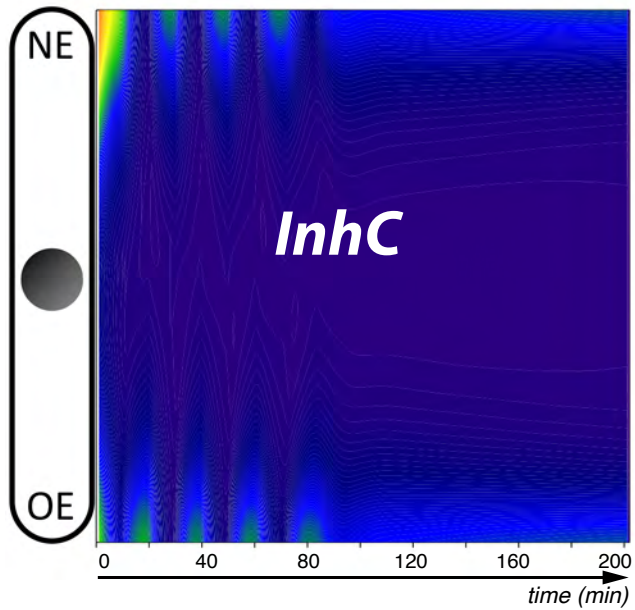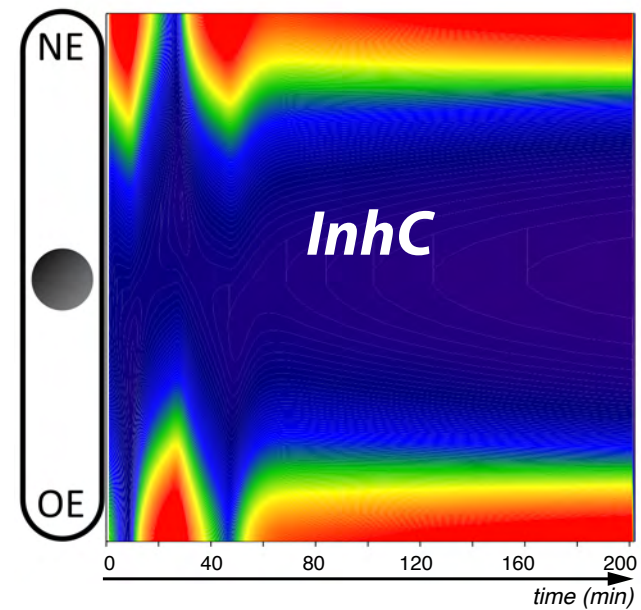

954 **Figure 6. A model of the mechanistic contribution of Tea3 to GTP-Cdc42**  
955 **oscillations and the bipolar growth switch.**

956

957



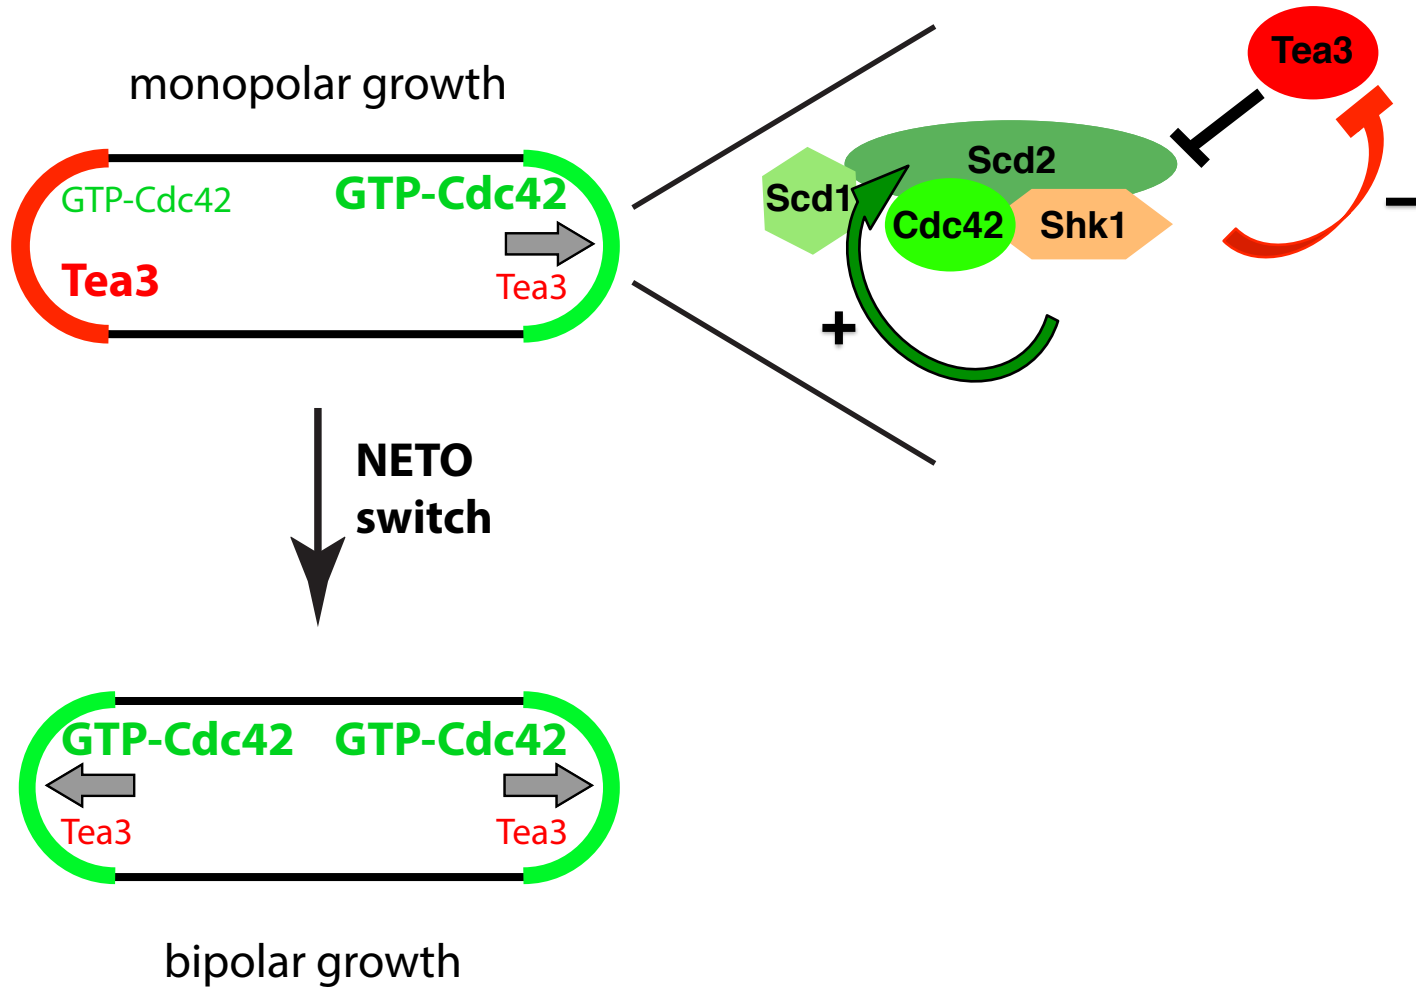

959 **Table 1**

| Strain  | Genotype                                                                                                                                                 | Source or reference |
|---------|----------------------------------------------------------------------------------------------------------------------------------------------------------|---------------------|
| M19     | <i>tea3Δ::Kan, ura4-D18, leu1-32, ade6-M216, P<sub>tea3</sub>-Tea3-GFP::Leu1, bgs4Δ::Ura4, P<sub>bgs4</sub>-RFP-Bgs4::Leu1</i>                           | This study          |
| MP18G08 | <i>h+; ade6-M210; leu1-32; ura4-D18; mat1_m-cyhS, smt0; rpl42::cyhR (sP56Q), Scd1-3GFP::Nat, bgs4Δ::ura4, P<sub>bgs4</sub>-RFP-Bgs4::Hph</i>             | This study          |
| MP18A08 | <i>h+; ade6-M210; leu1-32; ura4-D18; mat1_m-cyhS, smt0; rpl42::cyhR (sP56Q), Scd1-3GFP::Nat, bgs4Δ::ura4, P<sub>bgs4</sub>-RFP-Bgs4::Hph, tea3Δ::Kan</i> | This study          |
| RCS774  | <i>h-; ade6-M210; leu1-32; ura4-D18; mat1_m-cyhS, smt0; rpl42::cyhR (sP56Q), Scd2-GFP::Nat, bgs4Δ::ura4, P<sub>bgs4</sub>-RFP-Bgs4::Hph</i>              | This study          |
| MP05C01 | <i>h+; ade6-M210; leu1-32; ura4-D18; mat1_m-cyhS, smt0; rpl42::cyhR (sP56Q), Scd2-GFP::Nat, bgs4Δ::ura4, P<sub>bgs4</sub>-RFP-Bgs4::Hph, rgf1Δ::Kan</i>  | This study          |
| MP05A02 | <i>h+; ade6-M210; leu1-32; ura4-D18; mat1_m-cyhS, smt0; rpl42::cyhR (sP56Q), Scd2-GFP::Nat, bgs4Δ::ura4, P<sub>bgs4</sub>-RFP-Bgs4::Hph, tea3Δ::Kan</i>  | This study          |

|         |                                                                                                                                                         |            |
|---------|---------------------------------------------------------------------------------------------------------------------------------------------------------|------------|
| RCS763  | <i>h-; ade6-M210; leu1-32; ura4-D18; mat1_m-cyhS, smt0; rpl42::cyhR (sP56Q), Tea3-GFP::Nat, bgs4Δ::ura4, P<sub>bgs4</sub>-RFP-Bgs4::Hph</i>             | This study |
| MP02C12 | <i>h+; ade6-M210; leu1-32; ura4-D18; mat1_m-cyhS, smt0; rpl42::cyhR (sP56Q), Tea3-GFP::Nat, bgs4Δ::ura4, P<sub>bgs4</sub>-RFP-Bgs4::Hph, scd2Δ::Kan</i> | This study |
| MH412   | <i>h+, ura4-D18, leu1-32, ade6-M216, Tea3-GBP-mCherry::Hph</i>                                                                                          | This study |
| M140    | <i>ura4-D18, leu1-32, ade6-M216, Tea3-GBP-mCherry::Hph, Cdr2-GFP::Kan</i>                                                                               | This study |
| RCS1062 | <i>ura4-D18, leu1-32, ade6-M216, Tea3-GBP-mCherry::Hph, Rga4-GFP::Kan</i>                                                                               | This study |
| RCS1071 | <i>ade6-M210; leu1-32; ura4-D18; Tea3-GBP::Hph, bgs4Δ::ura4, P<sub>bgs4</sub>-RFP-Bgs4::Bsd</i>                                                         | This study |
| RCS1066 | <i>ade6-M210; leu1-32; ura4-D18; Rga4-GFP::Kan, bgs4Δ::ura4, P<sub>bgs4</sub>-RFP-Bgs4::Hph</i>                                                         | This study |
| RCS1067 | <i>ade6-M210; leu1-32; ura4-D18; Cdr2-GFP::Kan, bgs4Δ::ura4, P<sub>bgs4</sub>-RFP-Bgs4::Hph</i>                                                         | This study |
| RCS1064 | <i>ade6-M210; leu1-32; ura4-D18; Tea3-GBP::Hph, Rga4-GFP::Kan, bgs4Δ::ura4,</i>                                                                         | This study |

|                |                                                                                                                 |                      |
|----------------|-----------------------------------------------------------------------------------------------------------------|----------------------|
|                | <i>P<sub>bgs4</sub>-RFP-Bgs4::Bsd</i>                                                                           |                      |
| RCS1065        | <i>ade6-M210; leu1-32; ura4-D18; Tea3-GBP::Hph, Cdr2-GFP::Kan , bgs4Δ::ura4, P<sub>bgs4</sub>-RFP-Bgs4::Bsd</i> | This study           |
| RCS320         | <i>cdc10-129, leu1-32, Tea3-GFP::Nat</i>                                                                        | This study           |
| RCS312         | <i>Cdc25-22, Tea3-GFP::Nat</i>                                                                                  | This study           |
| RCS237         | <i>h-, ade6-M210, leu1-32, ura4-D18, his7, Tea3-GFP::Nat, mCherry-Atb2::Hph</i>                                 | This study           |
| RCS573         | <i>ade6-M210, leu1-32, ura4-D18, Tea3-GFP::Nat, mCherry-Atb2::Hph, tea1Δ::Ura4</i>                              | This study           |
| RCS285         | <i>ade6-M210, leu1-32, ura4-D18, Tea3-GFP::Nat, mod5Δ::Kan</i>                                                  | This study           |
| RCS297         | <i>h-, ade6-M210, leu1-32, ura4-D18, Tea3-GFP::Nat, mod5Δ::Kan, tea1Δ::Ura4</i>                                 | This study           |
| M7             | <i>h+, tea3Δ::Kan, ura4-D18, leu1-32, ade6-M216, P<sub>tea3</sub>-Tea3-GFP::Leu1</i>                            | This study           |
| M37            | <i>h+, tea3Δ::Kan, ura4-D18, leu1-32, ade6-M216, P<sub>tea3</sub>-Tea3-6A-GFP::Leu1</i>                         | This study           |
| RCS734         | <i>ade6-M210, leu1-32, ura4-D18, mod5Δ::Nat, kin1Δ::Kan</i>                                                     | This study           |
| nmt1-shk1K415R | <i>h90, shk1::Ura4:: P<sub>nmt1</sub>-shk1K415R-ADE2, ade6-M210, leu1-32, ura4-D18</i>                          | (Qyang et al., 2002) |
| TYH1           | <i>h+, ade6-M210, leu1-32, ura4-D18, Ura4:: P<sub>nmt1</sub>-Nak1</i>                                           | (Huang et al., 2003) |

|       |                                                                                                                                                                                                             |                                    |
|-------|-------------------------------------------------------------------------------------------------------------------------------------------------------------------------------------------------------------|------------------------------------|
| PN556 | <i>h+</i> , <i>ade6-M210</i> , <i>leu1-32</i> , <i>ura4-D18</i>                                                                                                                                             | Paul Nurse's lab                   |
| M102  | <i>MATa</i> , <i>ura3-1</i> , <i>trp1-28</i> , <i>leu2Δ0</i> , <i>lys2</i> , <i>his7</i> ,<br><i>mob1::kanR pep4::LEU2/pMH919-Tea3</i>                                                                      | <i>S. cerevisiae</i><br>This study |
| M104  | <i>MATa</i> , <i>ura3-1</i> , <i>trp1-28</i> , <i>leu2Δ0</i> , <i>lys2</i> , <i>his7</i> ,<br><i>mob1::kanR pep4::LEU2/pMH919-Tea3-6A</i>                                                                   | <i>S. cerevisiae</i><br>This study |
| M150  | <i>MATa</i> , <i>ura3-1</i> , <i>trp1-28</i> , <i>leu2Δ0</i> , <i>lys2</i> , <i>his7</i> ,<br><i>mob1::kanR pep4::LEU2/pMG1-Shk1</i>                                                                        | <i>S. cerevisiae</i><br>This study |
| M152  | <i>MATa</i> , <i>ura3-1</i> , <i>trp1-28</i> , <i>leu2Δ0</i> , <i>lys2</i> , <i>his7</i> ,<br><i>mob1::kanR pep4::LEU2/pMG1</i>                                                                             | <i>S. cerevisiae</i><br>This study |
| M153  | <i>MATa</i> , <i>ura3-1</i> , <i>trp1-28</i> , <i>leu2Δ0</i> , <i>lys2</i> , <i>his7</i> ,<br><i>mob1::kanR pep4::LEU2/pMH919-Scd2-3HA</i>                                                                  | <i>S. cerevisiae</i><br>This study |
| M146  | <i>ade6-M210</i> ; <i>leu1-32</i> ; <i>ura4-D18</i> ; <i>Tea3-GBP::Hph</i> , <i>Rga4-GFP::Kan</i> , <i>bgs4Δ::ura4</i> ,<br><i>P<sub>bgs4</sub>-RFP-Bgs4::Bsd</i> , <i>P<sub>tea3</sub>-Tea3-ProA::Leu1</i> | This study                         |
| M147  | <i>ade6-M210</i> ; <i>leu1-32</i> ; <i>ura4-D18</i> ; <i>Tea3-GBP::Hph</i> , <i>Cdr2-GFP::Kan</i> , <i>bgs4Δ::ura4</i> ,<br><i>P<sub>bgs4</sub>-RFP-Bgs4::Bsd</i> , <i>P<sub>tea3</sub>-Tea3-ProA::Leu1</i> | This study                         |
| M148  | <i>ade6-M210</i> ; <i>leu1-32</i> ; <i>ura4-D18</i> ; <i>Tea3-GBP::Hph</i> , <i>bgs4Δ::ura4</i> , <i>P<sub>bgs4</sub>-RFP-Bgs4::Leu1</i> , <i>P<sub>Shk1</sub>-cytosolic GFP::Leu1</i>                      | This study                         |
| M149  | <i>h+</i> , <i>tea3Δ::Kan</i> , <i>ura4-D18</i> , <i>leu1-32</i> , <i>ade6-M216</i> , <i>bgs4Δ::ura4</i> , <i>P<sub>bgs4</sub>-RFP-Bgs4::Hph</i> ,<br><i>P<sub>tea3</sub>-Tea3-6A-GFP::Leu1</i>             | This study                         |
| M141  | <i>h+</i> ; <i>ade6-M210</i> ; <i>leu1-32</i> ; <i>ura4-D18</i> ;                                                                                                                                           | This study                         |

|         |                                                                                                                                                                                                 |                    |
|---------|-------------------------------------------------------------------------------------------------------------------------------------------------------------------------------------------------|--------------------|
|         | <i>mat1_m-cyhS, smt0; rpl42::cyhR (sP56Q), Scd2-GFP::Nat, bgs4Δ::ura4, P<sub>bgs4</sub>-RFP-Bgs4::Hph, tea3Δ::Kan, P<sub>tea3</sub>-Tea3-mCherry::Leu1</i>                                      |                    |
| M142    | <i>h+; ade6-M210; leu1-32; ura4-D18; mat1_m-cyhS, smt0; rpl42::cyhR (sP56Q), Scd2-GFP::Nat, bgs4Δ::ura4, P<sub>bgs4</sub>-RFP-Bgs4::Hph, tea3Δ::Kan, P<sub>tea3</sub>-Tea3-6A-mCherry::Leu1</i> | This study         |
| RCS517  | <i>tea3Δ::Kan</i>                                                                                                                                                                               | Bioneer collection |
| MH374   | <i>h-; ade6-M216; his7; leu1-32; ura4-D18; nat-Pnmt41-GFP-Shk1</i>                                                                                                                              | This study         |
| MP11C06 | <i>h+; ade6-M210; leu1-32; ura4-D18; mat1_m-cyhS, smt0; rpl42::cyhR (sP56Q), nmt41-GFP-Shk1::Nat, bgs4Δ::ura4, P<sub>bgs4</sub>-RFP-Bgs4::Hph, scd2Δ::Kan</i>                                   | This study         |
| M156    | <i>ura4-D18, leu1-32, ade6-M216, P<sub>tea3</sub>-Tea3-GFP::Leu1</i>                                                                                                                            | This study         |

960
